# Supplementary material for: Postnatal β-cell maturation is associated with islet-specific microRNA changes induced by nutrient shifts at weaning
Source: PubMed Central journal article supplement (PMC4569696; doi:10.1038/ncomms9084), 2015-09-02
Supplement: ncomms9084-s1.pdf [file ncomms9084-s1.pdf]

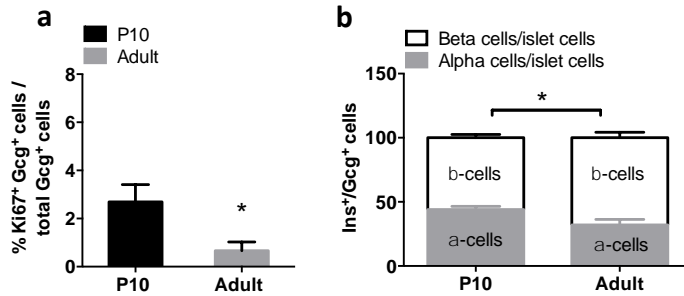

**Supplementary Figure 1. Alpha-cell proliferation and mass in newborn and adult islets.** (a) Proliferation was assessed by scoring the Ki67-positive (Ki67<sup>+</sup>) cells co-labelled with glucagon (Gcg<sup>+</sup>) (b) The fraction of alpha and  $\beta$ -cells in neonatal and adult islets was determined by immunohistochemical staining for glucagon and insulin, respectively. Data are means  $\pm$  SD; n=3 per group; Student's t-test \*P<0.05).



**DNA REPLICATION**

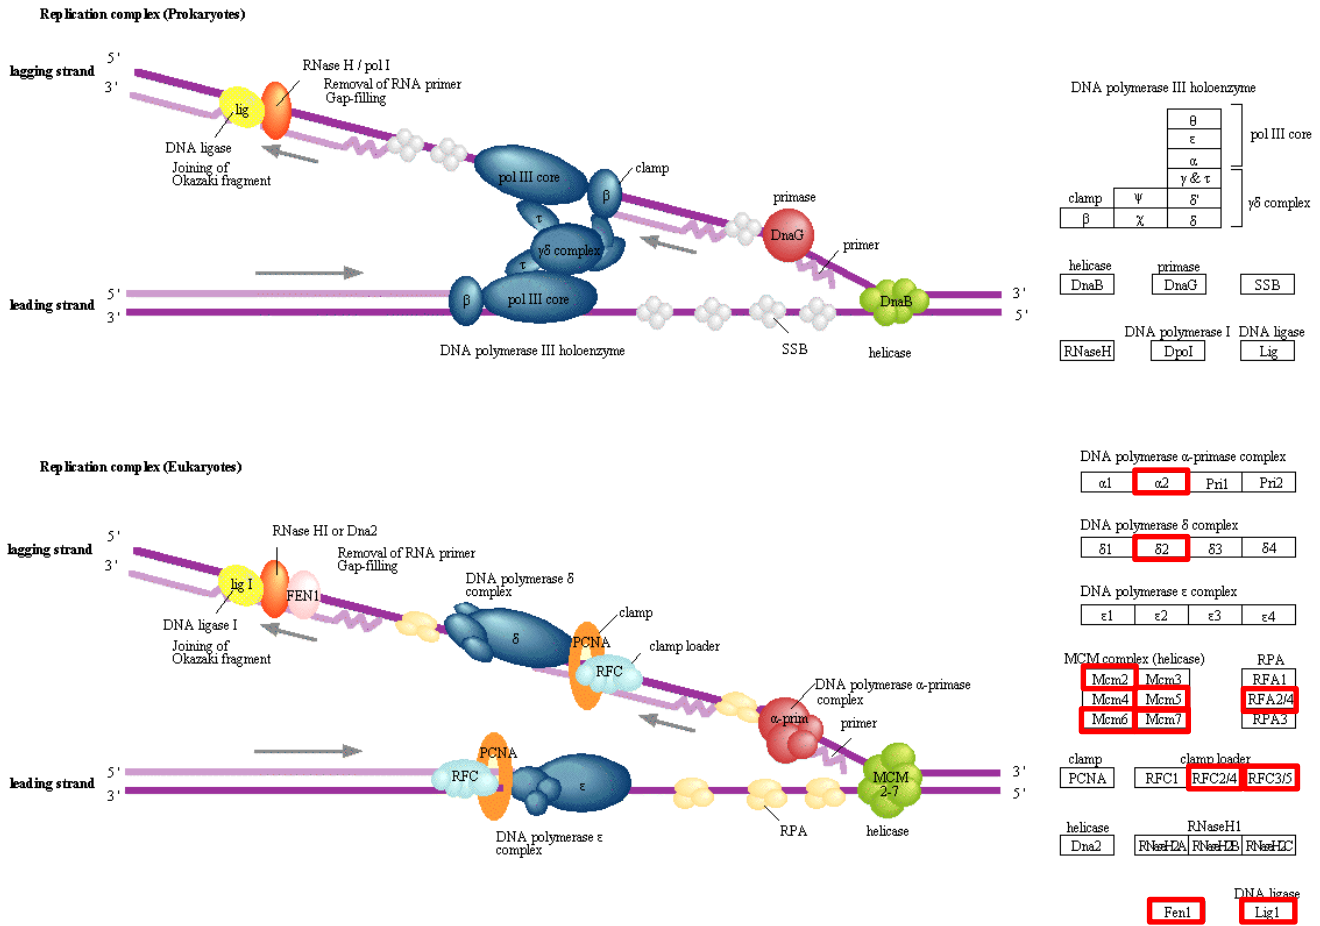

03030 10/20/10  
(c) Kanehisa Laboratories

**Supplementary Figure 3. Enriched DNA replication pathway in adult versus 10-day-old rat islets defined by KEGG pathway analysis.** The genes down-regulated are boxed in red. Supplementary table 2 shows the fold change (FC) values reported from the array (n=3 per group) and confirmed by qRT-PCR (n=4 per group) and RNA-sequencing (n=3 per group). (a: absent; Adj-p value <0.05).

INSULIN SECRETION

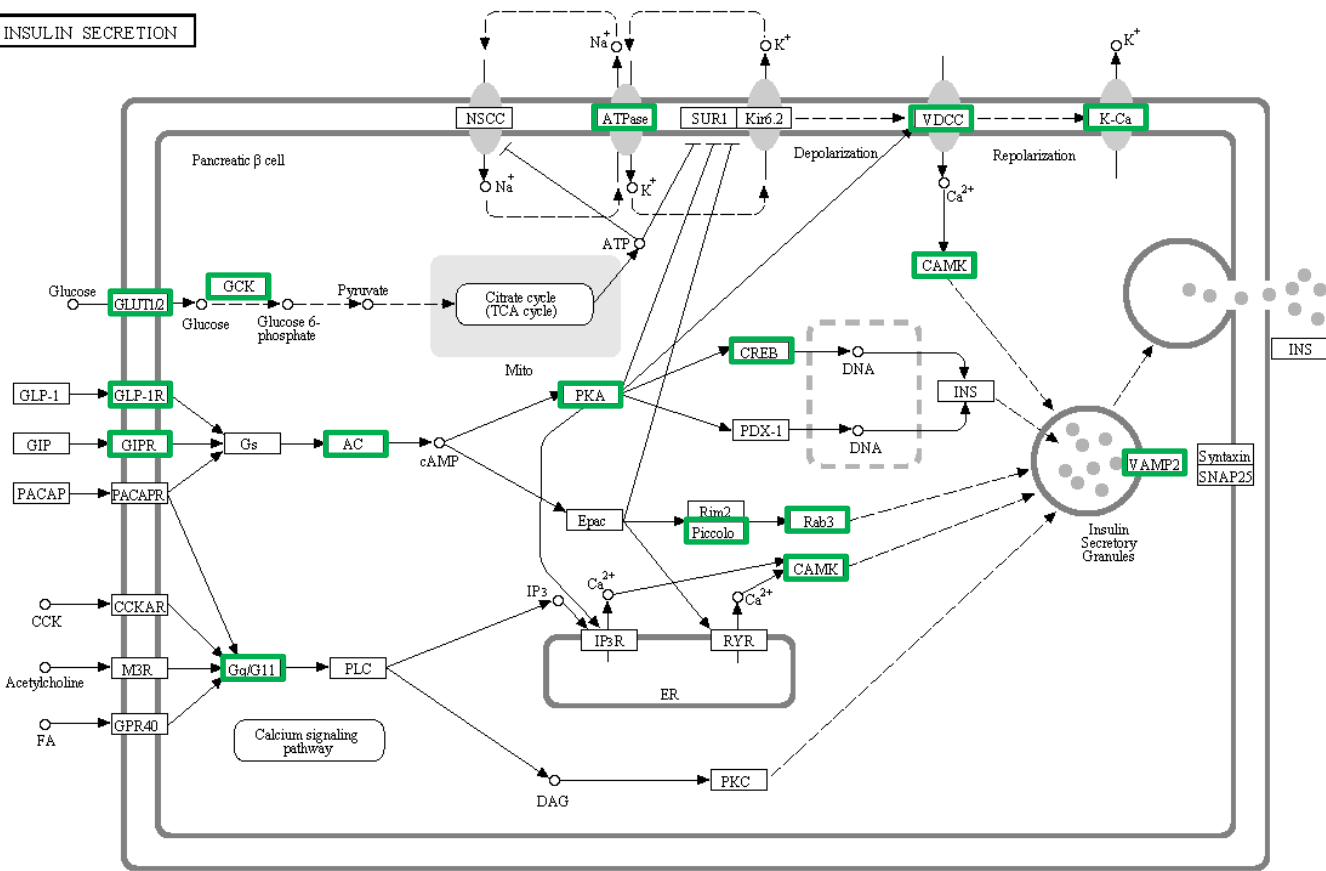

04911 4/25/14  
 (c) Kanehisa Laboratories

**Supplementary Figure 4. Enriched insulin secretion pathway in adult versus 10-day-old rat islets defined by KEGG pathway analysis.** The genes up-regulated are boxed in green. Supplementary table 3 shows the fold change (FC) values reported from the array (n=3 per group) and confirmed by qRT-PCR (n=4 per group) and RNA-sequencing (n=3 per group). (a: absent; Adj-p value <0.05).

GLYCOLYSIS / GLUCONEOGENESIS

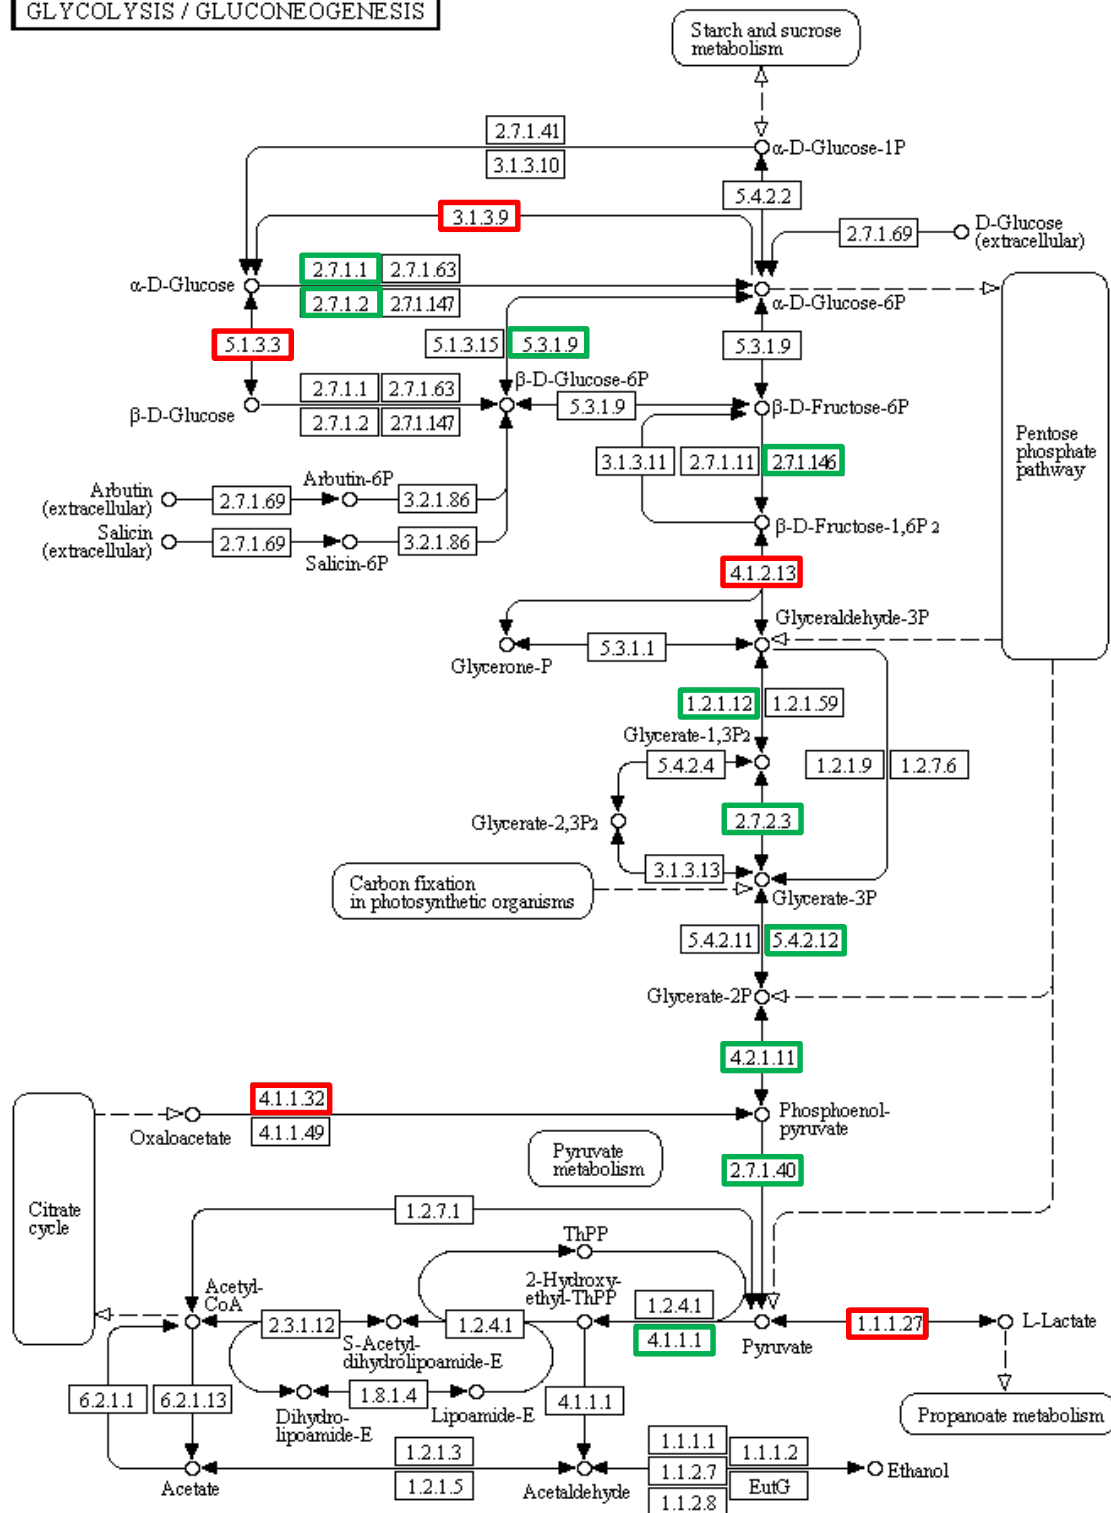

00010 2/18/14  
(c) Kanehisa Laboratories

**Supplementary Figure 5. Enriched glycolysis/gluconeogenesis pathway in adult versus 10-day-old rat islets defined by KEGG pathway analysis.** The genes down-regulated are boxed in red and the genes up-regulated are boxed in green. Supplementary table 4 shows the fold change (FC) values reported from the array (n=3 per group) and confirmed by qRT-PCR (n=4 per group) and RNA-sequencing (n=3 per group). (a: absent; Adj-p value <0.05).

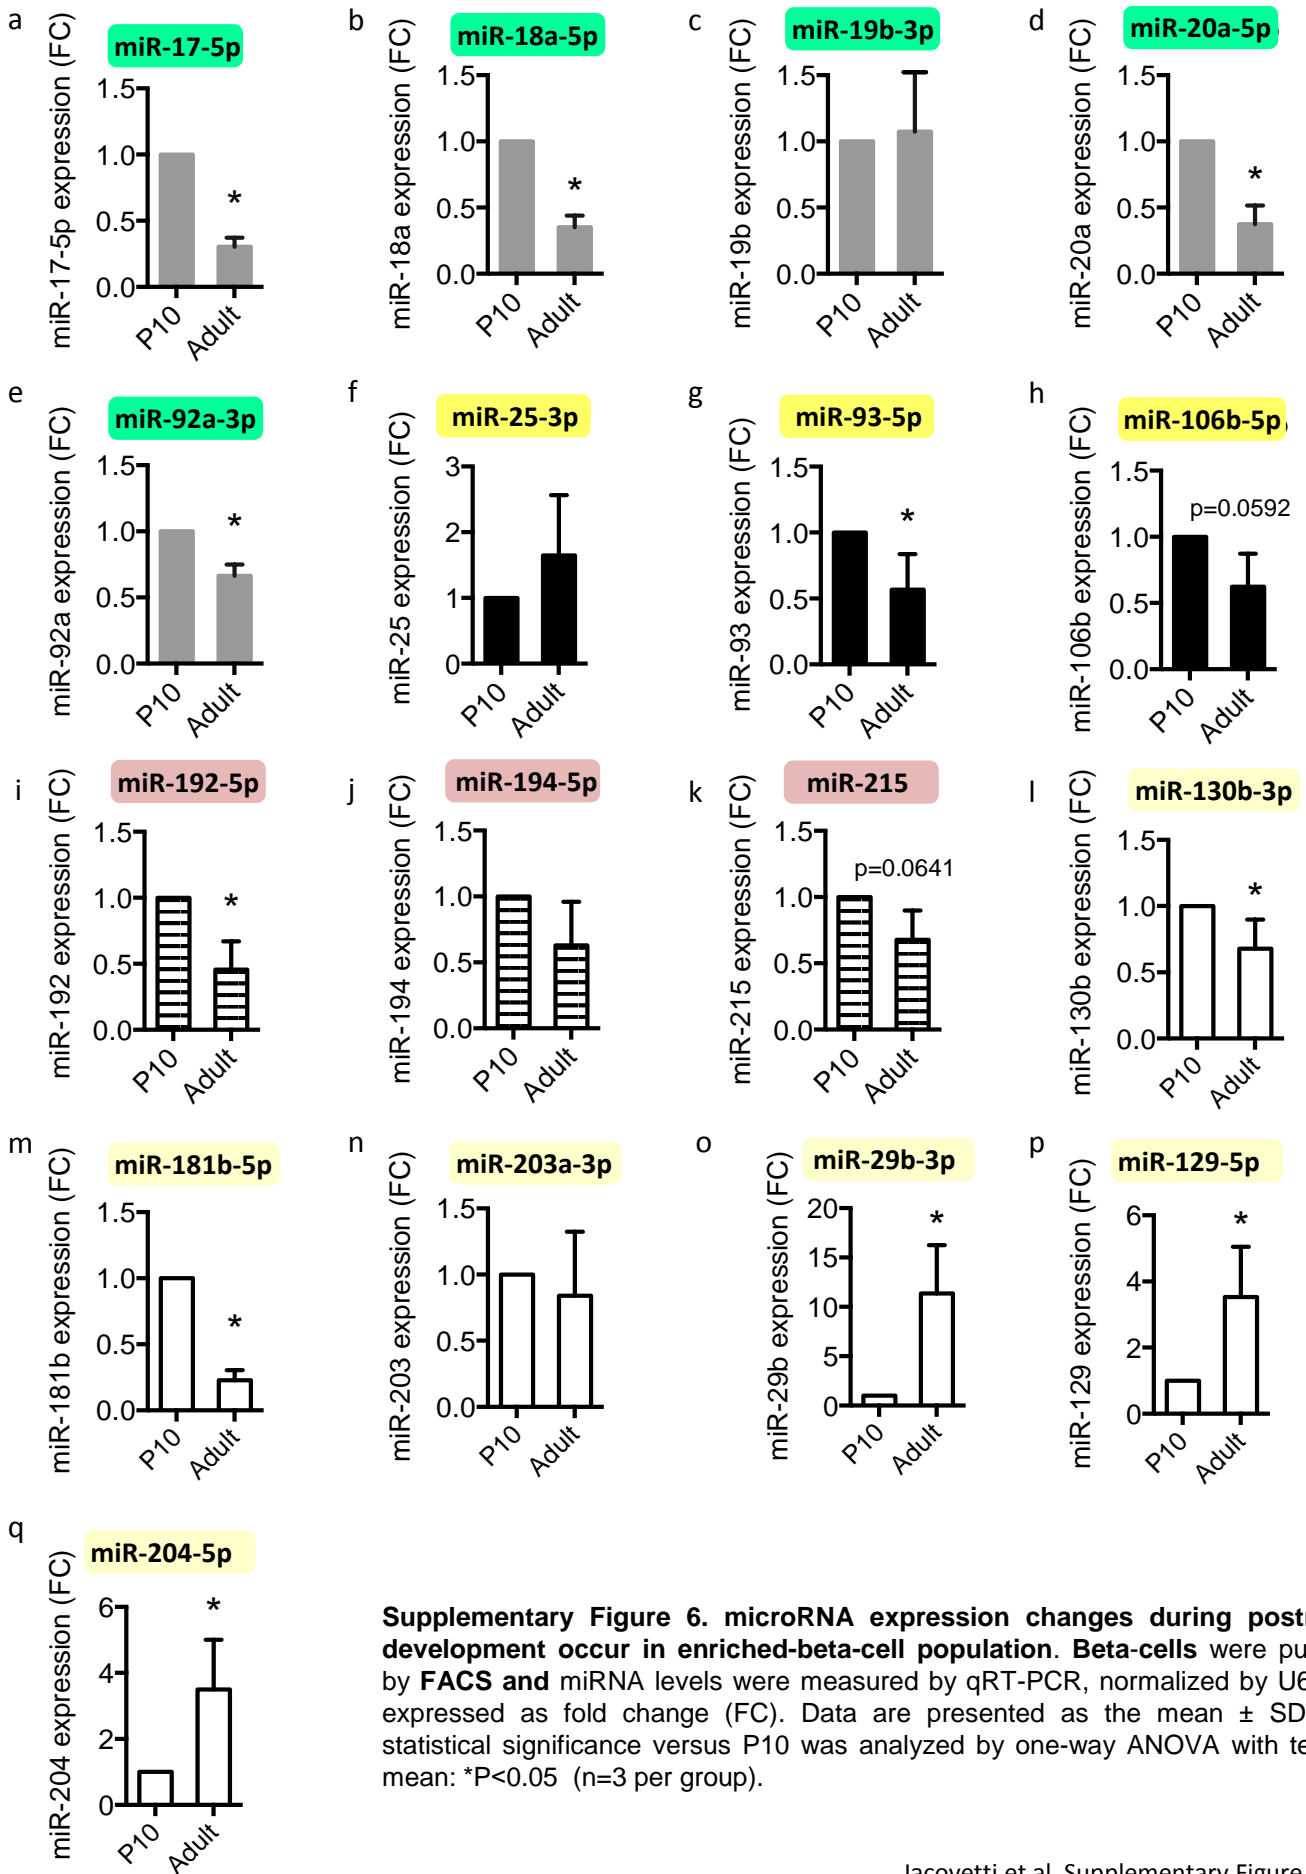

**Supplementary Figure 6. microRNA expression changes during postnatal development occur in enriched-beta-cell population. Beta-cells** were purified by **FACS** and miRNA levels were measured by qRT-PCR, normalized by U6 and expressed as fold change (FC). Data are presented as the mean  $\pm$  SD and statistical significance versus P10 was analyzed by one-way ANOVA with test of mean: \* $P < 0.05$  (n=3 per group).

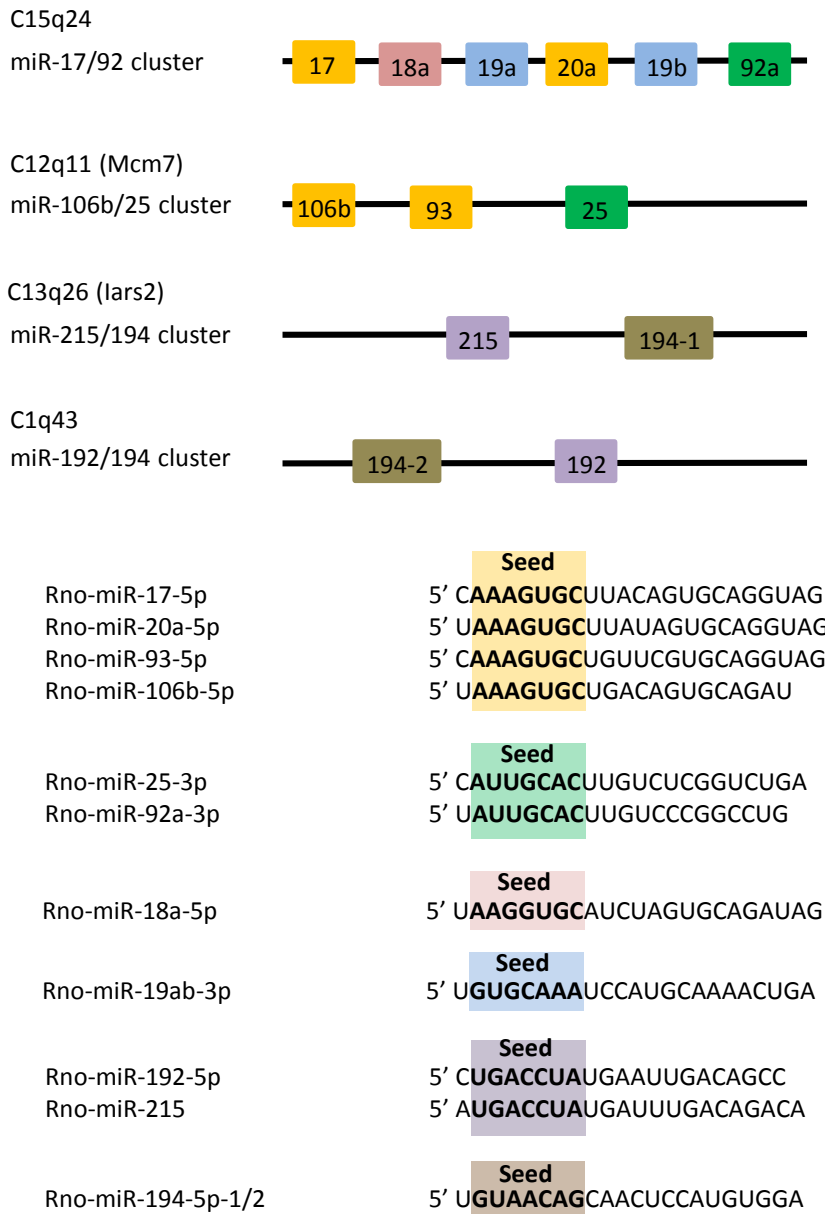

**Supplementary Figure 7. A schematic view of the microRNA clusters identified in the microarray.** The chromosomal locations of the miRNA cluster-encoding genes in rat are indicated. The individual miRNAs encoded from polycistronic genes are represented by boxes. miRNA sharing the same seed sequence are represented by boxes of the same colour. Seed sequences are shown in bold.

|                 |                                    |
|-----------------|------------------------------------|
| C13q21          | <b>Seed</b>                        |
| Rno-miR-181a-5p | 5' <b>ACAUUCA</b> ACGCUGUCGGUGAGU  |
| C13q21          |                                    |
| Rno-miR-181b-5p | 5' <b>ACAUUCA</b> UUGCUGUCGGUGGGU  |
| C19q11          |                                    |
| Rno-miR-181c-5p | 5' <b>ACAUUCA</b> ACCUGUCGGUGAGU   |
| C19q11          |                                    |
| Rno-miR-181d-5p | 5' <b>ACAUUCA</b> UUGUUGUCGGUGGGU  |
|                 |                                    |
| C4q21           | <b>Seed</b>                        |
| Rno-miR-29a-3p  | 5' <b>UAGCACCA</b> UCUGAAAUCGGUUA  |
| C4q21           |                                    |
| Rno-miR-29b-3p  | 5' <b>UAGCACCA</b> UUUGAAAUCAGUGUU |
| C1p11           |                                    |
| Rno-miR-29c-5p  | 5' <b>UGACCGAU</b> UUCUCCUGGUGUUC  |

**Supplementary Figure 8. A schematic view of the microRNA families identified in the microarray.** The chromosomic locations of the miRNA family-encoding genes in rat are indicated. Seed sequences are shown in bold.



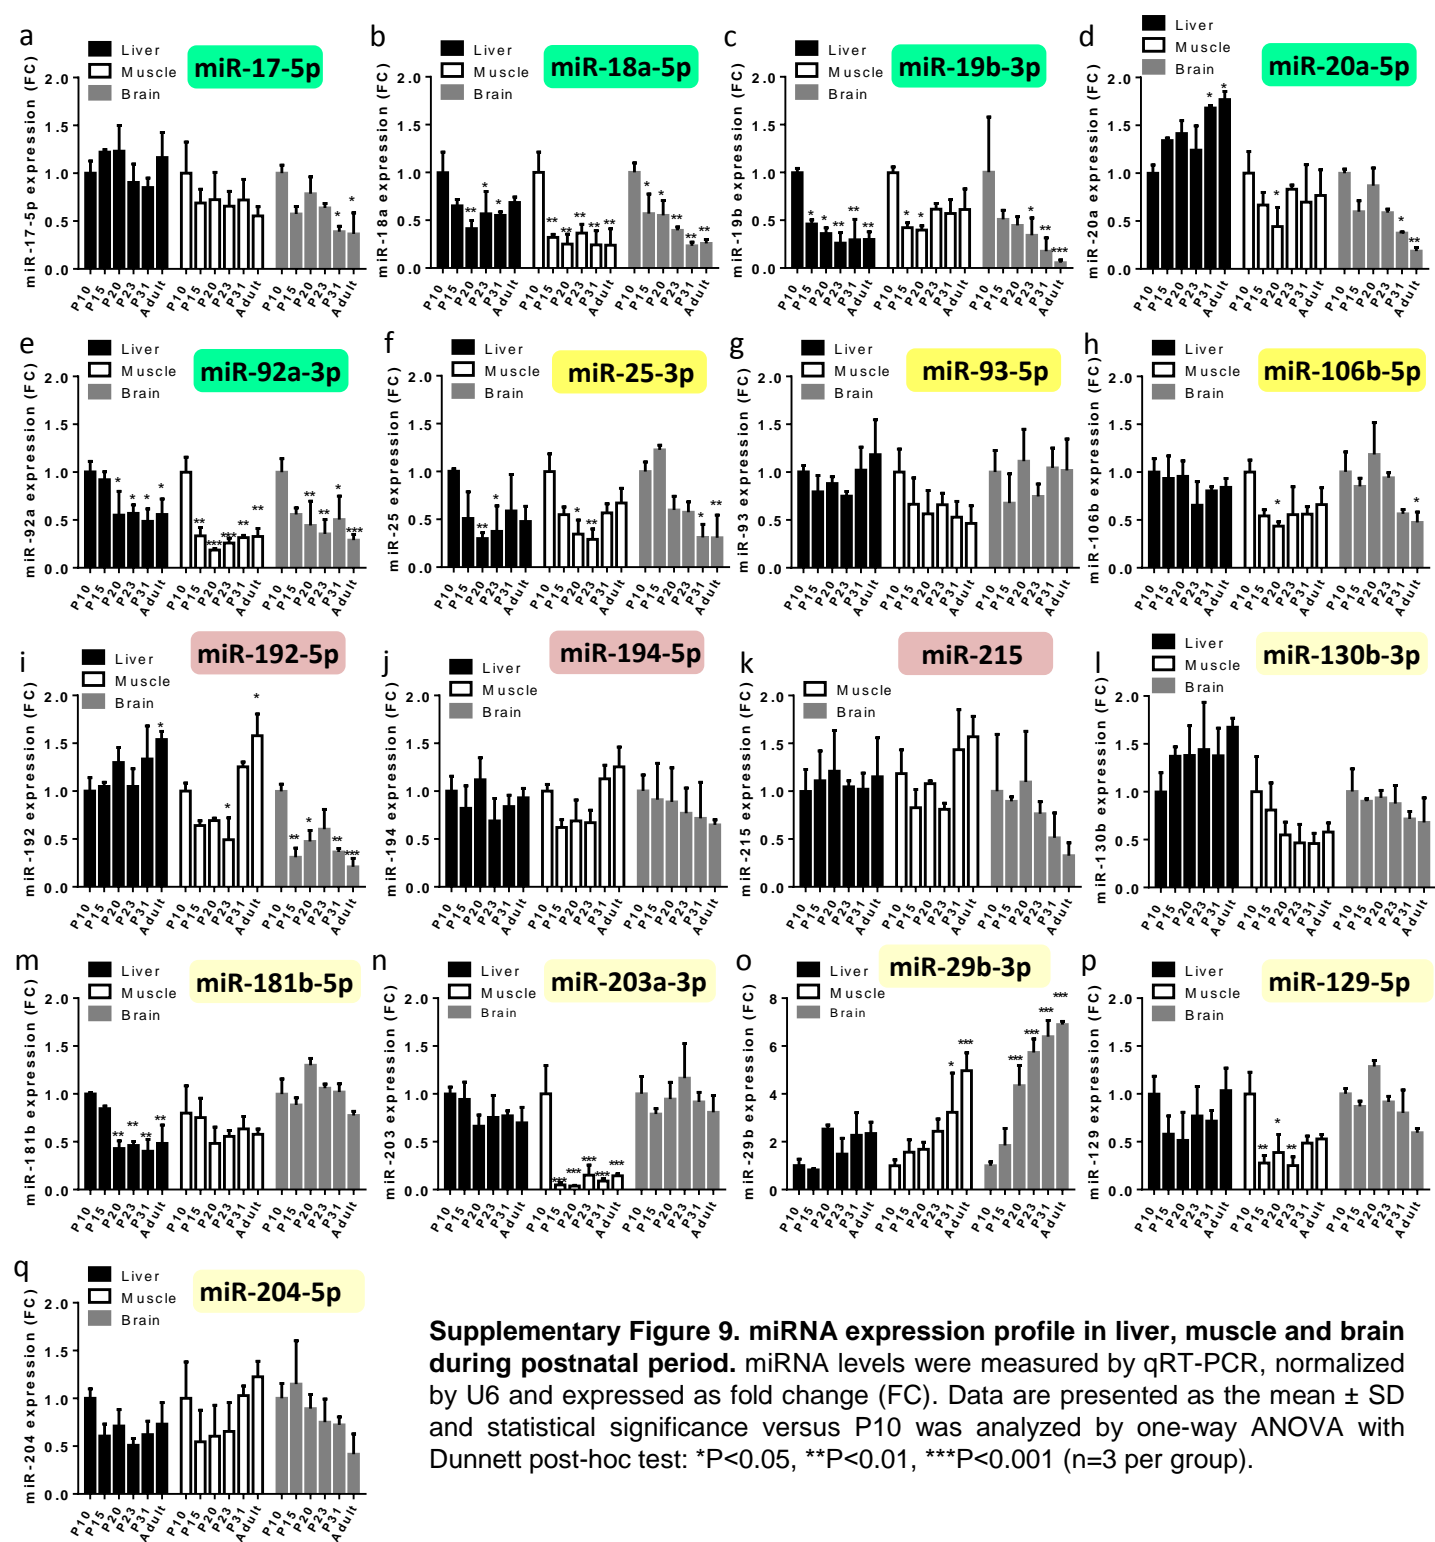

**Supplementary Figure 9. miRNA expression profile in liver, muscle and brain during postnatal period.** miRNA levels were measured by qRT-PCR, normalized by U6 and expressed as fold change (FC). Data are presented as the mean  $\pm$  SD and statistical significance versus P10 was analyzed by one-way ANOVA with Dunnett post-hoc test: \* $P < 0.05$ , \*\* $P < 0.01$ , \*\*\* $P < 0.001$  ( $n = 3$  per group).

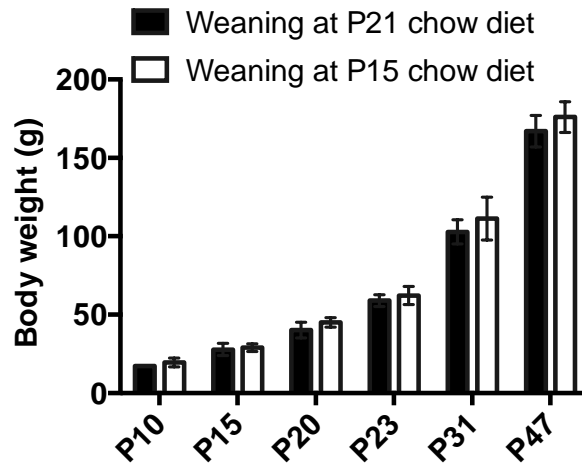

Supplementary Figure 10. Body weight of pups weaned at P21 (normal weaning) or P15 (premature weaning). n=4-8 per group.

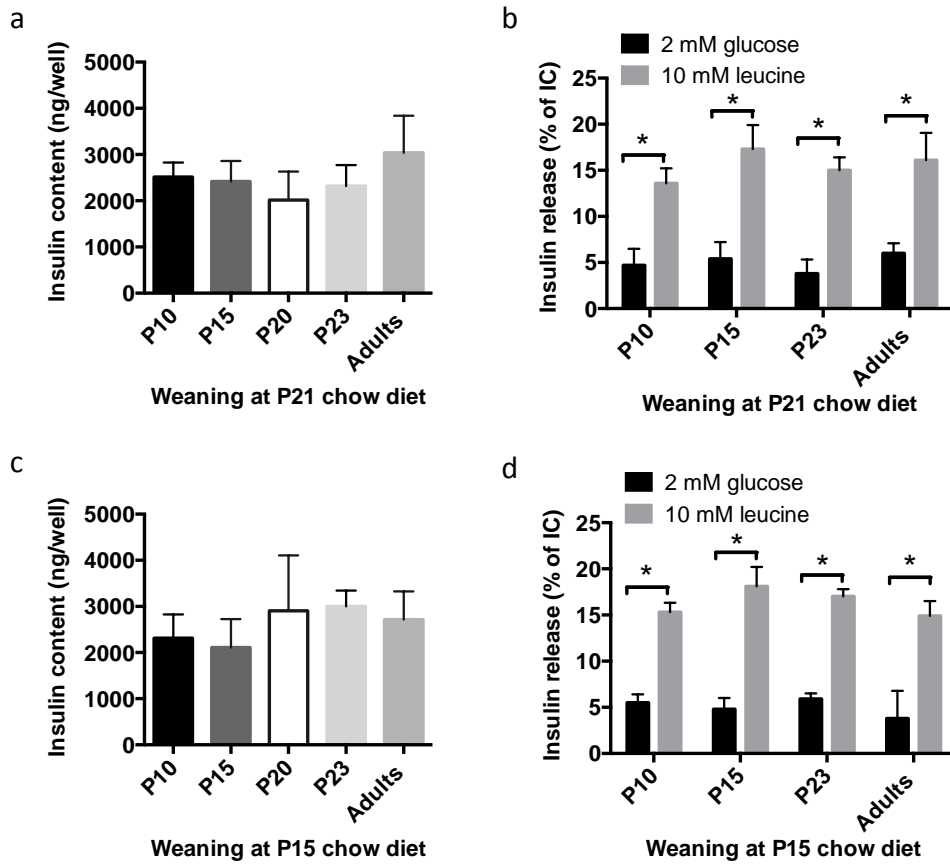

**Supplementary Figure 11. Insulin secretion and content.** (a,c) Insulin content and (b,d) insulin release after 45 min exposure to 2 mM glucose or 10 mM leucine (n=3-6) in rats weaned at P21 (top panel) or P15 (lower panel). Insulin contents and levels were measured by ELISA. Data are means  $\pm$  SD (ANOVA, \* $<$ P0.05).

### Normal weaning at P21

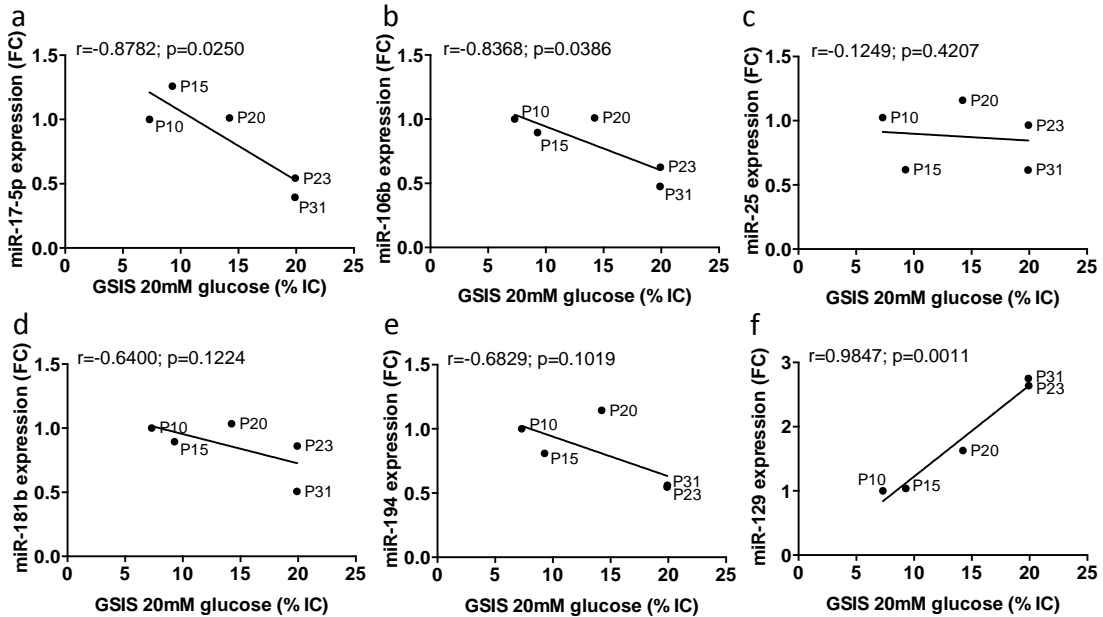

### Early weaning at P15

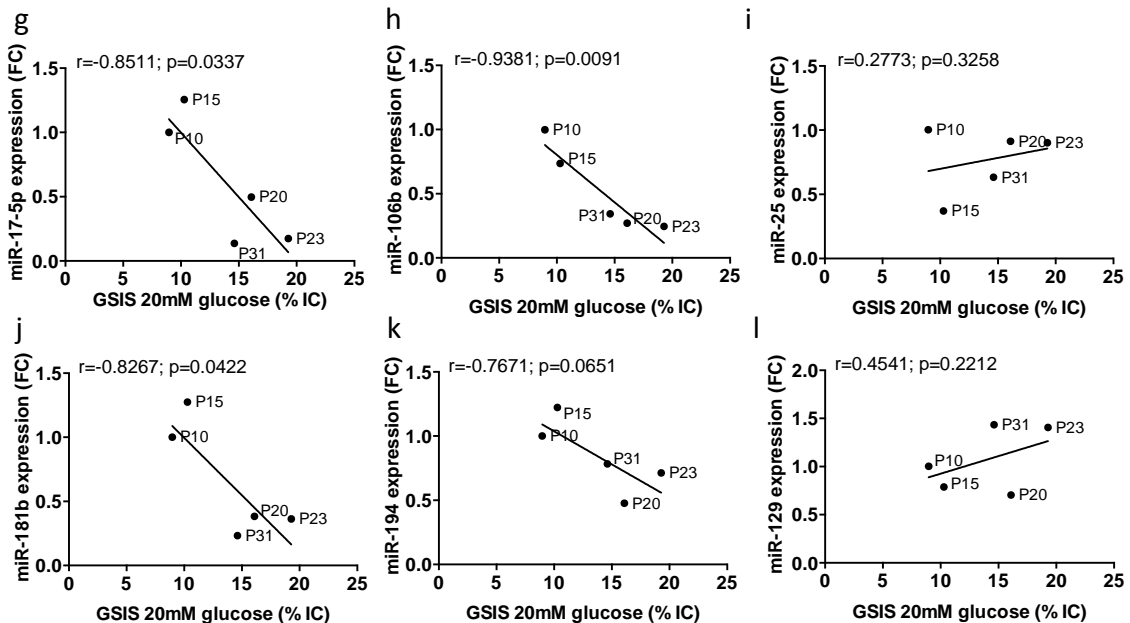

**Supplementary Figure 12. Positive and negative correlations between miRNA levels and glucose-stimulated insulin secretion during time course.** Rats were weaned at P21 (a-f) or at P15 (g-l). miRNA levels were measured by qRT-PCR, normalized by U6 and expressed as fold change (FC). Insulin release upon exposure of whole islets to 20 mM glucose for 45 min was assessed by ELISA, normalized by insulin content and expressed as fold change (FC). Data are the mean from 4 to 6 independent measurements. P-values  $\leq 0.05$  considered for significance. Correlations were established with Pearson correlation test.

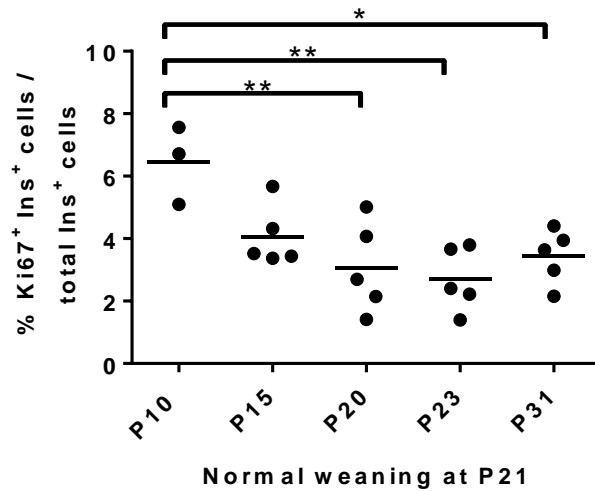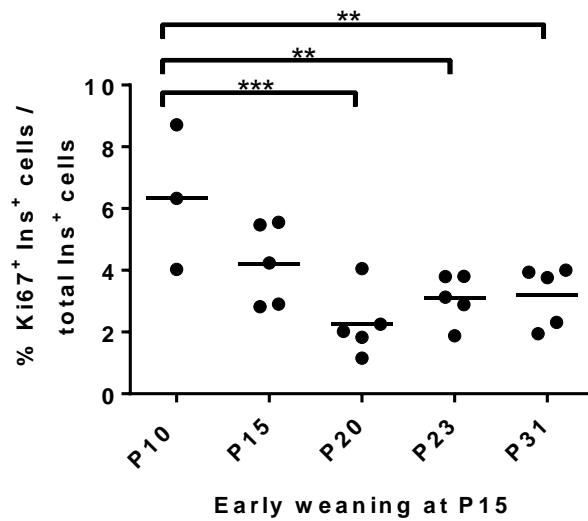

**Supplementary Figure 13. Impact of premature weaning on  $\beta$ -cell proliferation.** Proliferating Ki67-positive cells in rats weaned at P21 (top panel) or P15 (lower panel). Statistical differences from P10 was determined by ANOVA using Tukey's post-hoc test for multiple comparisons. \* $P < 0.05$ , \*\* $P < 0.01$ , \*\*\* $P < 0.001$  ( $n = 3-5$  per group).

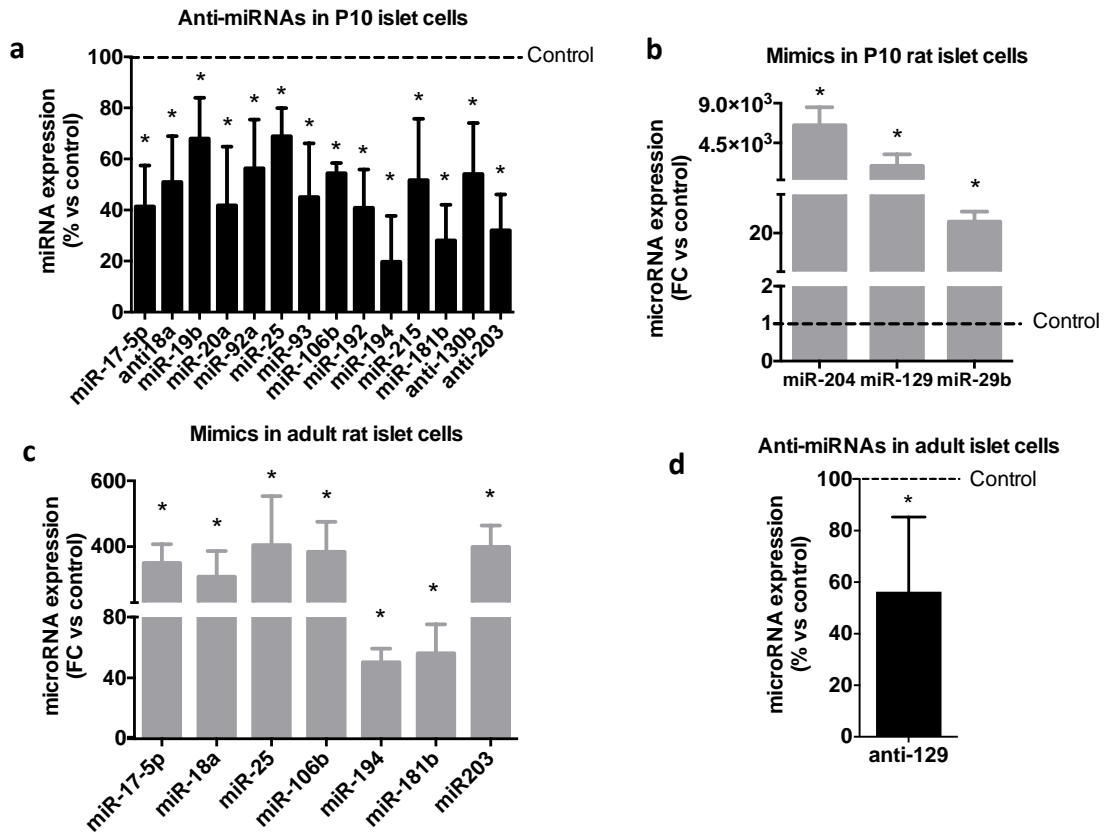

**Supplementary Figure 14. Down- and up-regulation of microRNAs in dispersed rat islet cells.** 10-day-old (a,b) and adult (c,d) rat islets were dissociated and transfected for 48h. To reduce the indicated miRNAs either in P10 (a) or in adult (d) islet cells, we used single-stranded anti-miRNAs or a scrambled anti-miR sequence as control. To increase the level of the indicated miRNAs either in P10 (b) or adult (c) islets cells, we used oligonucleotide mimics or an siRNA duplex against GFP as control. Results are expressed as fold changes *versus* control or as percentage of the control anti-miR ± SD (n=3-7). Statistical differences were determined by Student's t-test (\*P<0.05).

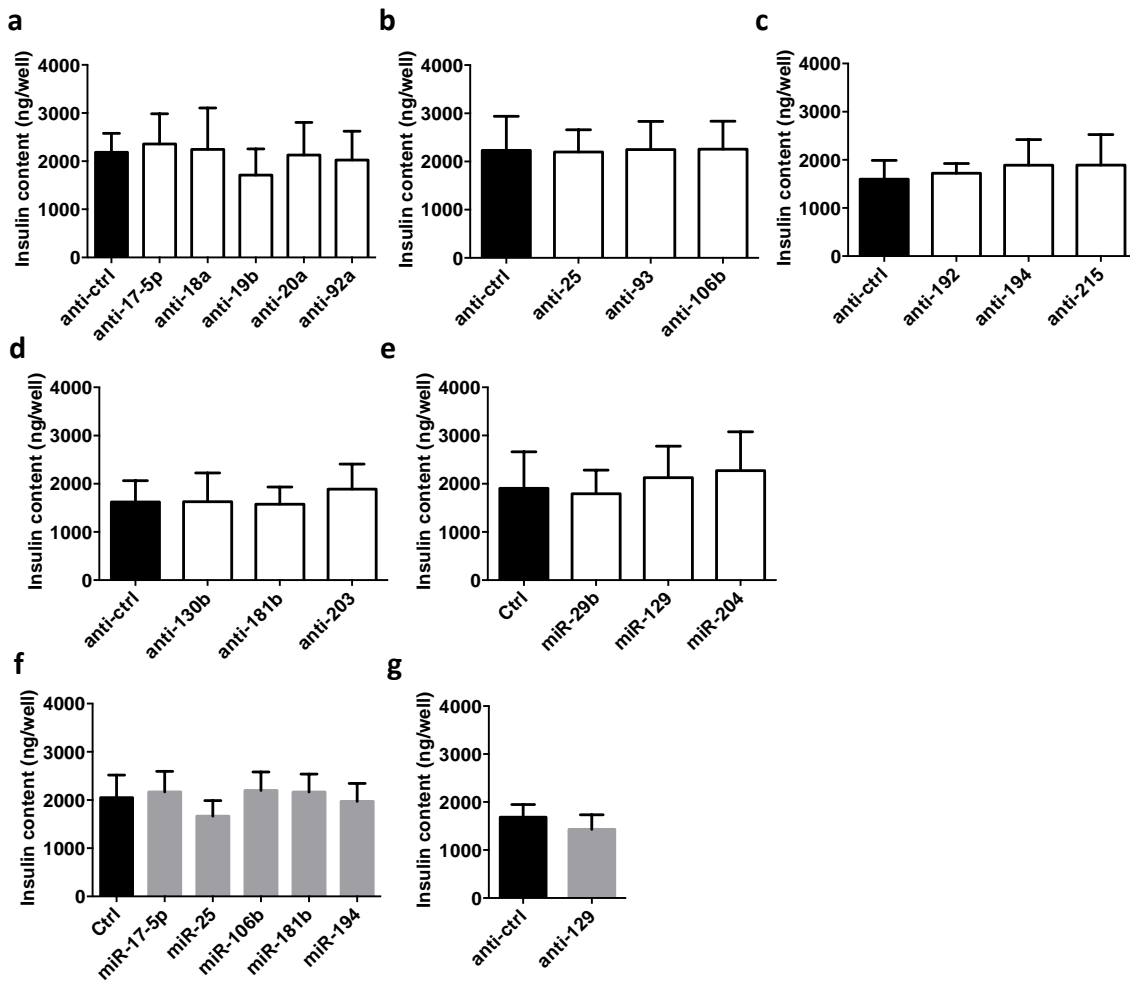

**Supplementary Figure 15. Insulin content from dissociated P10 and adult rat islet cells.** 10-day-old (a-e) and adult (f,g) rat islets were dispersed, transfected for 48h and incubated in the presence of 2 mM or 20 mM glucose for 45 min. Insulin contents were measured by ELISA (n=5-6). Data are means  $\pm$  SD (ANOVA, \* $<$ P0.05).

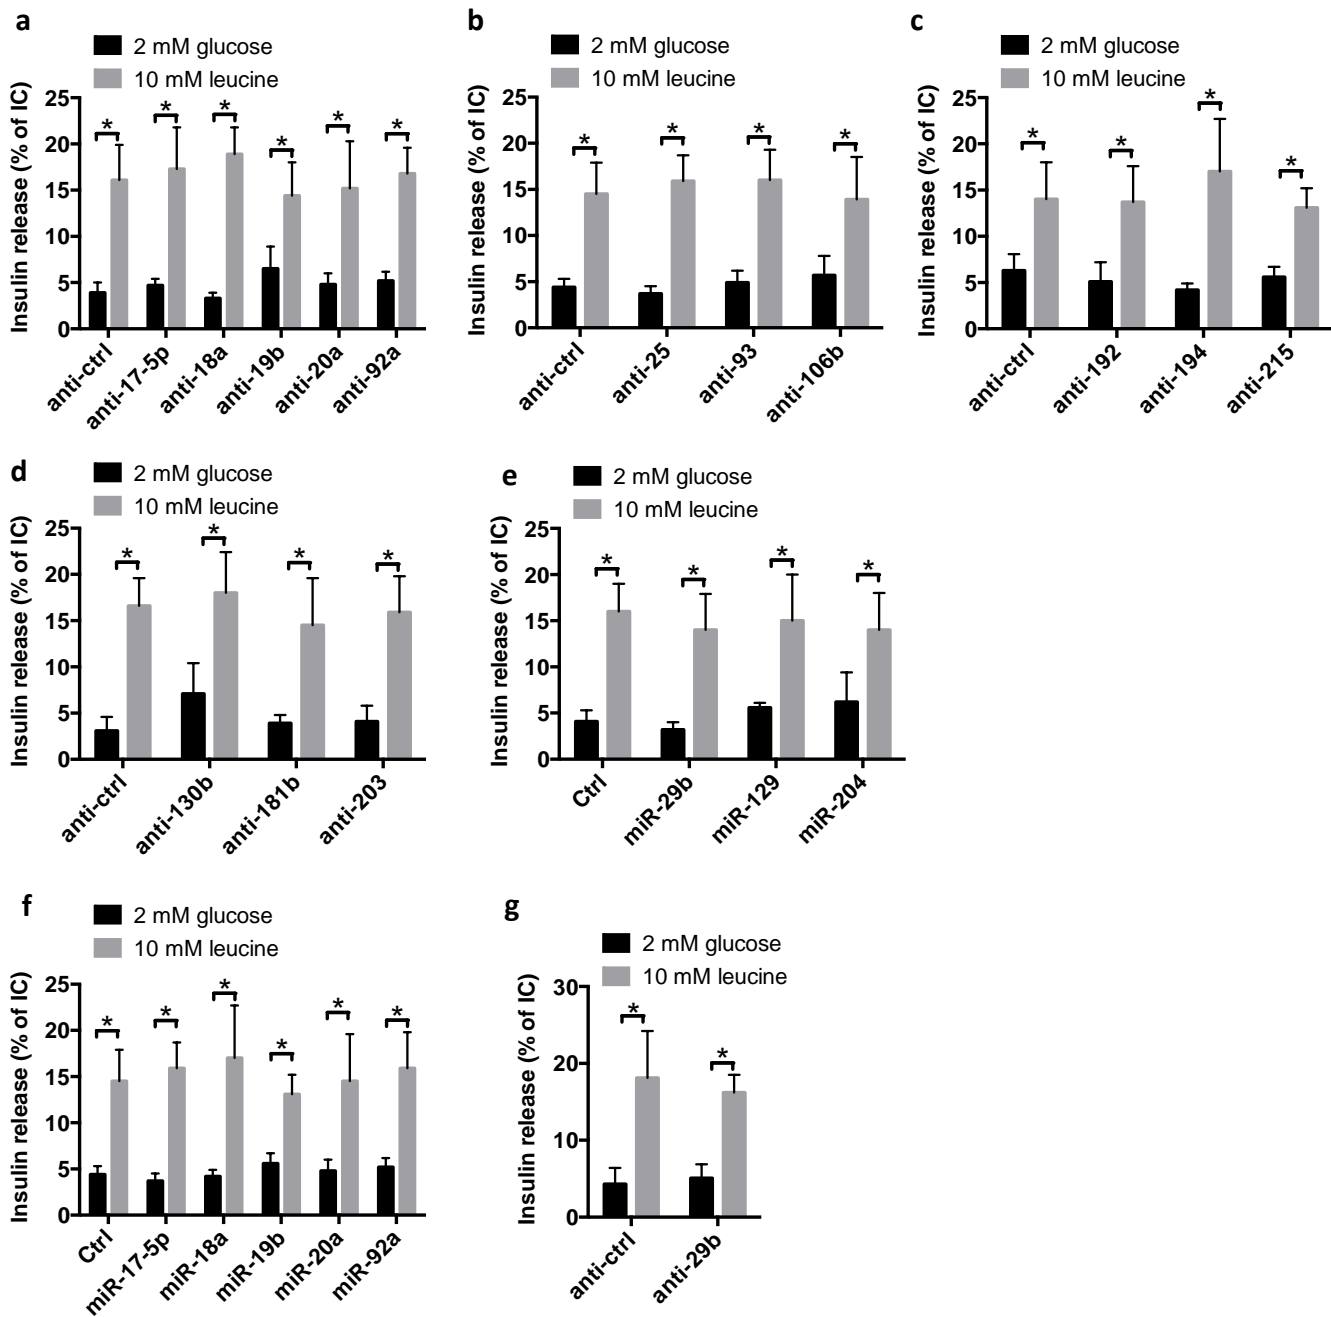

**Supplementary Figure 16. Insulin secretion from dissociated P10 and adult rat islet cells.** 10-day-old (a-e) and adult (f,g) rat islets were dispersed, transfected for 48h and incubated in the absence or the presence of 10 mM leucine for 45 min. Insulin levels and insulin contents were measured by ELISA (n=5-6). Data are means  $\pm$  SD (ANOVA, \* $P$ <0.05).



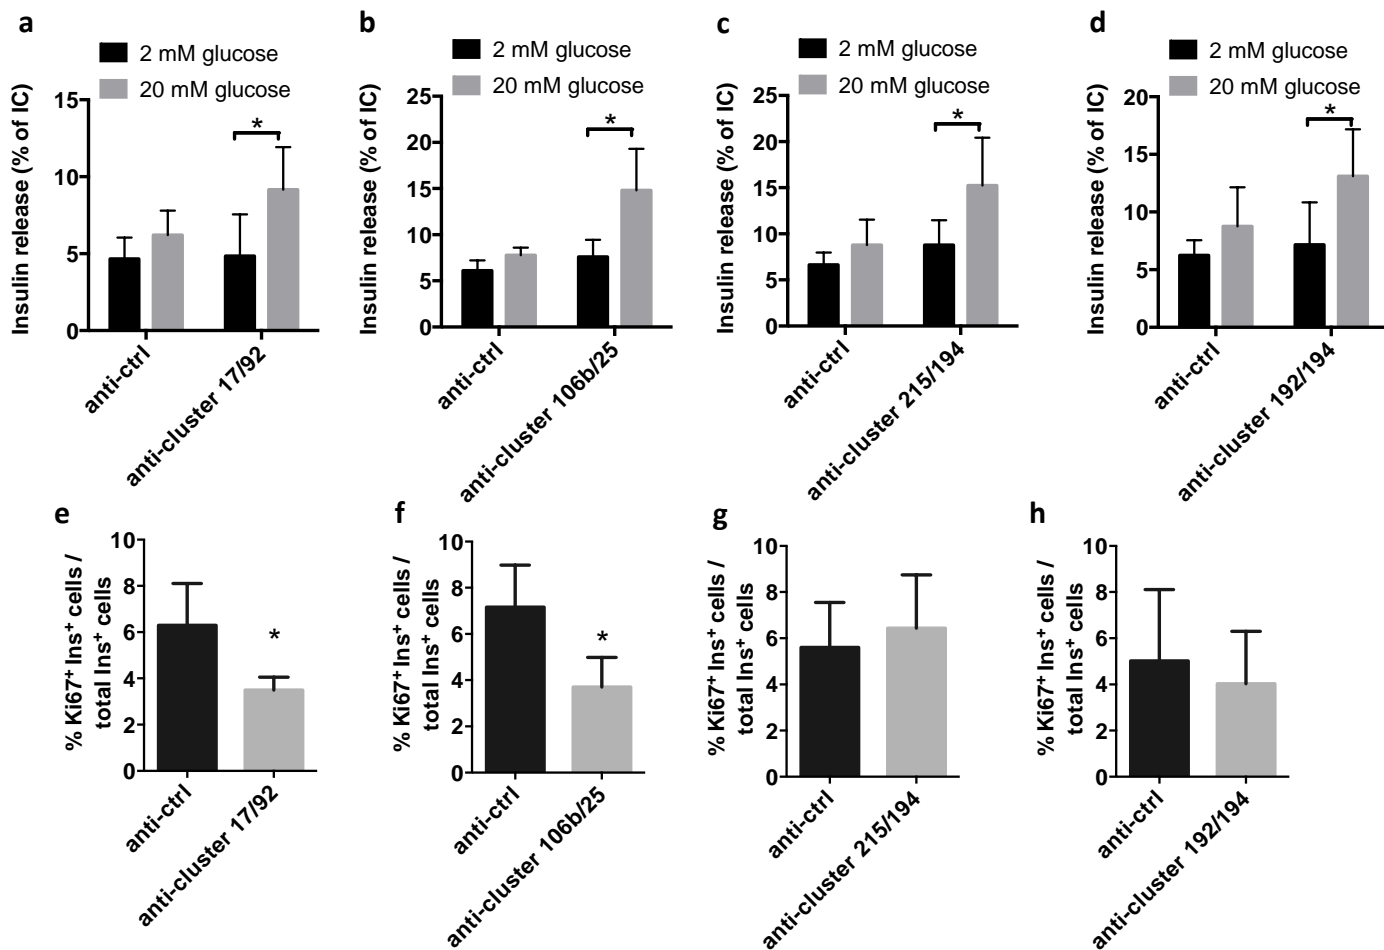

**Supplementary Figure 17. Insulin secretion and  $\beta$ -cell proliferation from dissociated P10 rat islet cells.** Dissociated P10 rat islet cells were transfected with a pool of the indicated anti-miRs. Two days later, insulin release and content was assessed in P10 islet cells incubated at 2 or 20 mM glucose (n=4). The proliferating insulin+ cells from P10 rats was assessed by Ki67 staining (n=4). Data are means  $\pm$  SD. Statistical significance versus anti-ctrl was assessed by ANOVA: \*P<0.05.

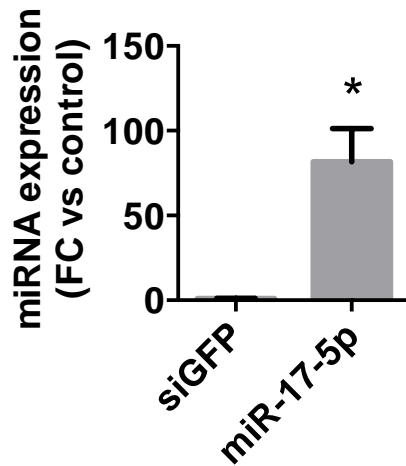

**Supplementary Figure 18. miR-17-5p overexpression in dispersed rat islet cells.** 10-day-old rat islets were dissociated and transfected for 48h. We used oligonucleotide mimics corresponding to the mature sequence of miR-17-5p or a siRNA duplex against GFP as a control. Results are expressed as fold change *versus* control (n=3). Data are presented as the mean  $\pm$  SD and statistical differences were determined by ANOVA and Student's t-test (\*P<0.05).

**Supplementary Table 1. Enriched cell cycle pathway in adult versus 10-day-old rat islets defined by KEGG pathway analysis**

| Cell cycle-KEGG reference rno 04110 - Adult versus P10 rat islets |                                             |            |          |              |         |                   |             |                      |
|-------------------------------------------------------------------|---------------------------------------------|------------|----------|--------------|---------|-------------------|-------------|----------------------|
| Gene symbol                                                       | Gene description                            | FC (array) | p-value  | FC (qRT-PCR) | p-value | FC (RNA-seq)      | Adj p-value | Adult FPKM (RNA-seq) |
| Ccna2                                                             | Cyclin A2                                   | -4.2       | 2.0E-04  | -3.2         | 1.8E-02 | below read cutoff |             | 0.1                  |
| Ccnb1                                                             | Cyclin B1                                   | -4.1       | 5.0E-03  | -45.6        | 6.2E-03 | -5.9              | 7.2E-06     | 1.6                  |
| Ccnb2                                                             | Cyclin B2                                   | -3.7       | 1.4E-06  | -            | -       | below read cutoff |             | 2.4                  |
| Ccnd2                                                             | Cyclin D2                                   | -5.1       | 3.1E-06  | 1.6          | 1.2E-02 | 1.3               | 2.2E-01     | 85.5                 |
| Ccne1                                                             | Cyclin E                                    | -2.2       | 6.2E-05  | -            | -       | below read cutoff |             | 0.9                  |
| Ccnj1                                                             | Cyclin J-like                               | -4.8       | 6.6E-07  | -            | -       | below read cutoff |             | 0.1                  |
| Cdkn1a                                                            | Cyclin-dependent kinase inhibitor 1A (p21)  | a          | a        | -1.1         | 1.6E-01 | -1.6              | 1.6E-01     | 16.1                 |
| Cdkn1b                                                            | Cyclin-dependent kinase inhibitor 1B (p27)  | 2.0        | 4.2E-03  | 1.0          | 1.6E-01 | -1.0              | 9.7E-01     | 20.3                 |
| Myc                                                               | Myelocytomatosis viral oncogene (c-Myc)     | -6.5       | 2.4E-05  | -4.3         | 2.6E-02 | -2.9              | 3.1E-02     | 4.4                  |
| Cyld                                                              | Cylindromatosis                             | 1.7        | 1.78E-04 | 1.6          | 3.2E-02 | 1.3               | 5.8E-01     | 5.7                  |
| Mcm7                                                              | Minichromosome maintenance deficient 7      | -3.8       | 1.9E-04  | -            | -       | -2.4              | 2.5E-03     | 7.8                  |
| Rbl2                                                              | Retinoblastoma-like 2 (Rbl2, p130)          | 1.6        | 7.69E-03 | 1.2          | 4.1E-01 | 1.2               | 8.1E-01     | 3.9                  |
| Pten                                                              | Phosphatase and tensin homolog              | 1.0        | 2.43E-01 | 2.1          | 1.1E-02 | below read cutoff |             | 3.1                  |
| Smad2                                                             | SMAD family member 2                        | -1.0       | 8.37E-01 | -1.3         | 6.0E-02 | -1.7              | 5.1E-01     | 5.0                  |
| Smad3                                                             | SMAD family member 3                        | a          | a        | -2.4         | 5.7E-02 | below read cutoff |             | 0.6                  |
| Smad4                                                             | SMAD family member 4                        | 1.1        | 1.30E-01 | -1.3         | 5.4E-02 | -1.1              | 8.9E-01     | 17.5                 |
| Tgfb2                                                             | Transforming growth factor, beta 2          | 2.2        | 6.5E-04  | -1.1         | 2.5E-01 | below read cutoff |             | 1.4                  |
| Tgfr1                                                             | Transforming growth factor, beta receptor 1 | 2.2        | 1.3E-02  | 1.1          | 3.4E-01 | -1.1              | 8.2E-01     | 3.5                  |
| Tgfr2                                                             | Transforming growth factor, beta receptor 2 | a          | a        | 1.6          | 4.3E-02 | -2.7              | 5.6E-02     | 2.4                  |
| Timp2                                                             | TIMP metalloproteinase inhibitor 2          | -1.1       | 7.19E-01 | 1.0          | 5.0E-01 | -3.1              | 3.6E-02     | 7.9                  |
| Timp3                                                             | TIMP metalloproteinase inhibitor 3          | 1.0        | 4.53E-04 | 1.0          | 2.7E-01 | -1.5              | 5.8E-01     | 4.9                  |

The fold change (FC) values reported from the array (n=3 per group) and confirmed by qRT-PCR (n=4 per group) and RNA-sequencing (n=3 per group). (a: absent; Adj-p value <0.05).

**Supplementary Table 2. Enriched DNA replication pathway in adult versus 10-day-old rat islets defined by KEGG pathway analysis**

| DNA replication-KEGG reference Ko 03030 - Adult versus P10 rat islets |                                        |            |         |              |         |                   |             |                      |
|-----------------------------------------------------------------------|----------------------------------------|------------|---------|--------------|---------|-------------------|-------------|----------------------|
| Gene symbol                                                           | Gene description                       | FC (array) | p-value | FC (qRT-PCR) | p-value | FC (RNA-seq)      | Adj p-value | Adult FPKM (RNA-seq) |
| Fen1                                                                  | Flap structure-specific endonuclease 1 | -2.6       | 5.2E-03 | -            | -       | -2.2              | 1.0E-02     | 4.4                  |
| Lig1                                                                  | Ligase I, DNA, ATP-dependent           | -2.8       | 1.4E-04 | -            | -       | -2.5              | 7.2E-04     | 5.5                  |
| Pola2                                                                 | Polymerase (DNA directed), alpha 2     | -3.7       | 1.1E-03 | -            | -       | below read cutoff |             | 1.2                  |
| Pold2                                                                 | Polymerase (DNA directed), delta 2     | -4.0       | 1.2E-06 | -            | -       | below read cutoff |             | 3.8                  |
| Mcm2                                                                  | Minichromosome maintenance deficient 2 | -3.6       | 3.0E-04 | -            | -       | -3.0              | 5.6E-06     | 5.0                  |
| Mcm5                                                                  | Minichromosome maintenance deficient 5 | -3.3       | 4.4E-02 | -            | -       | -2.9              | 3.9E-03     | 3.8                  |
| Mcm6                                                                  | Minichromosome maintenance deficient 6 | -3.5       | 5.6E-05 | -            | -       | -2.7              | 1.2E-03     | 3.5                  |
| Mcm7                                                                  | Minichromosome maintenance deficient 7 | -3.8       | 1.9E-04 | -            | -       | -2.4              | 2.5E-03     | 7.8                  |
| Rfc3                                                                  | Replication factor C (activator 1) 3   | -3.1       | 1.1E-05 | -            | -       | -3.0              | 5.8E-03     | 6.0                  |
| Rfc4                                                                  | Replication factor C (activator 1) 4   | -3.7       | 7.8E-07 | -            | -       | below read cutoff |             | 2.5                  |

The fold change (FC) values reported from the array (n=3 per group) and confirmed by qRT-PCR (n=4 per group) and RNA-sequencing (n=3 per group). (a: absent; Adj-p value <0.05).

**Supplementary Table 3. Enriched insulin secretion pathway in adult versus 10-day-old rat islets defined by KEGG pathway analysis**

| Insulin secretion-KEGG reference rno 04911 - Adult versus P10 rat islets |                                            |            |         |              |         |                   |             |                          |
|--------------------------------------------------------------------------|--------------------------------------------|------------|---------|--------------|---------|-------------------|-------------|--------------------------|
| Gene symbol                                                              | Gene description                           | FC (array) | p-value | FC (qRT-PCR) | p-value | FC (RNA-seq)      | Adj p-value | Adult FPKM (RNA-seq)     |
| Adcy8                                                                    | Adenylate cyclase                          | 4.2        | 5.3E-07 | -            | -       | below read cutoff |             | 0.3                      |
| Camk2b                                                                   | um/calmodulin-dependent protein kinase II, | 3.8        | 5.3E-04 | -            | -       | 1.1               | 6.7E-01     | 90.3                     |
| Gck                                                                      | Glucokinase                                | 5.9        | 3.8E-05 | 1.3          | 8.7E-02 | -1.1              | 5.9E-01     | 20.8                     |
| Glp1r                                                                    | Glucagon-like peptide 1 receptor           | 9.5        | 3.8E-05 | -            | -       | 1.8               | 9.2E-03     | 72.7                     |
| Gipr                                                                     | Gastric inhibitory polypeptide receptor    | 2.4        | 6.5E-05 | -            | -       | 1.6               | 2.5E-02     | 119.4                    |
| Slc2a2                                                                   | Solute carrier family 2, member 2 (Glut2)  | 9.7        | 4.9E-05 | 8.2          | 1.9E-03 | 2.2               | 2.3E-06     | 326.7                    |
| Stk11                                                                    | Serine/threonine kinase 11 (Lkb1)          | a          | a       | -1.8         | 2.2E-02 | 1.0               | 8.8E-01     | 30.8                     |
| Sirt1                                                                    | Sirtuin 1                                  | a          | a       | 1.7          | 2.9E-02 | a                 | a           | not in Rnor_5.0 database |
| Ucn3                                                                     | Urocortin 3                                | 6.8        | 1.5E-04 | 12.0         | 7.8E-04 | 1.9               | 1.3E-02     | 357.3                    |
| VAMP2                                                                    | Vesicle-associated membrane protein 2      | 2.9        | 1.3E-06 | -            | -       | 1.8               | 8.6E-03     | 92.4                     |

The fold change (FC) values reported from the array (n=3 per group) and confirmed by qRT-PCR (n=4 per group) and RNA-sequencing (n=3 per group). (a: absent; Adj-p value <0.05).

**Supplementary Table 4. Enriched glycolysis/gluconeogenesis pathway in adult versus 10-day-old rat islets defined by KEGG pathway analysis**

| Glycolysis/Gluconeogenesis-KEGG reference rno 00010 - Adult versus P10 rat islets |                                                                  |            |         |              |         |                   |             |                          |
|-----------------------------------------------------------------------------------|------------------------------------------------------------------|------------|---------|--------------|---------|-------------------|-------------|--------------------------|
| Gene symbol                                                                       | Gene description                                                 | FC (array) | p-value | FC (qRT-PCR) | p-value | FC (RNA-seq)      | Adj p-value | Adult FPKM (RNA-seq)     |
| Aldob                                                                             | Aldolase B                                                       | -44.4      | 4.7E-08 | -30.5        | 1.5E-02 | below read cutoff |             | 0.0                      |
| Aldoa                                                                             | Aldolase A                                                       | 1.9        | 2.7E-03 | -            | -       | 1.6               | 1.9E-02     | 991.4                    |
| Eno2                                                                              | Enolase 2, gamma                                                 | 5.3        | 7.2E-05 | 1.6          | 1.3E-02 | below read cutoff |             | 43.5                     |
| Gapdh                                                                             | Glyceraldehyde-3-phosphate dehydrogenase                         | 1.4        | 3.1E-02 | 1.1          | 3.3E-01 | 1.3               | 3.4E-01     | 1619.3                   |
| G6pc                                                                              | Glucose-6-phosphatase, catalytic                                 | -114.6     | 5.2E-07 | -31.0        | 6.5E-03 | below read cutoff |             | 0.4                      |
| G6pi                                                                              | Glucose-6-phosphate isomerase                                    | 1.2        | 2.1E-01 | 2.1          | 2.0E-02 | a                 | a           | not in Rnor_5.0 database |
| Gck                                                                               | Glucokinase                                                      | 5.9        | 3.8E-05 | 1.3          | 8.7E-02 | -1.1              | 5.9E-01     | 20.8                     |
| Glud1                                                                             | Glutamate dehydrogenase 1                                        | -2.2       | 2.5E-04 | -1.1         | 4.5E-01 | -1.0              | 8.7E-01     | 49.4                     |
| Gpd2                                                                              | Glucose-6-phosphate dehydrogenase 2, mitochondrial               | 1.1        | 6.4E-04 | 2.0          | 2.4E-02 | 1.5               | 5.2E-01     | 7.2                      |
| Ldha                                                                              | Lactate dehydrogenase A                                          | -3.9       | 1.5E-04 | -3.0         | 5.1E-02 | -3.5              | 3.8E-04     | 55.1                     |
| Mdh1                                                                              | Malate dehydrogenase 1, NAD (soluble)                            | a          | a       | 3.1          | 1.5E-02 | 1.9               | 5.9E-04     | 362.3                    |
| Mdh2                                                                              | Malate dehydrogenase 2, NAD (soluble)                            | 1.3        | 6.9E-04 | 1.0          | 4.2E-01 | 1.1               | 8.5E-01     | 181.7                    |
| Pc                                                                                | Pyruvate carboxylase                                             | 2.3        | 1.1E-04 | 3.8          | 3.9E-03 | 4.0               | 6.1E-13     | 44.3                     |
| Pfkm                                                                              | Phosphofructokinase, muscle                                      | 3.3        | 2.6E-05 | 2.0          | 3.9E-02 | 1.2               | 3.2E-01     | 21.8                     |
| Pfkp                                                                              | Phosphofructokinase, platelet                                    | 1.5        | 7.1E-04 | 3.8          | 1.2E-03 | 1.8               | 1.8E-02     | 17.5                     |
| Pck1                                                                              | Phosphoenolpyruvate carboxykinase 1 (PEPCK)                      | -1060.6    | 1.3E-07 | -719.6       | 1.3E-02 | below read cutoff |             | 0.0                      |
| Pck2                                                                              | Phosphoenolpyruvate carboxykinase 2 (PEPCK)                      | -2.3       | 1.3E-05 | -1.3         | 1.6E-01 | 1.0               | 8.9E-01     | 50.5                     |
| Pdha1                                                                             | Pyruvate dehydrogenase alpha 1                                   | 1.1        | 7.3E-01 | 2.2          | 3.0E-02 | -1.1              | 6.8E-01     | 25.7                     |
| Pgam1                                                                             | Phosphoglycerate mutase 1                                        | 2.3        | 3.5E-06 | 1.7          | 2.2E-02 | 1.4               | 1.3E-01     | 169.8                    |
| Pgam2                                                                             | Phosphoglycerate mutase 2                                        | 2.2        | 3.9E-04 | -            | -       | below read cutoff |             | 2.2                      |
| Pkm2                                                                              | Pyruvate kinase, muscle                                          | 4.5        | 1.8E-04 | 2.0          | 5.7E-01 | a                 | a           | not in Rnor_5.0 database |
| Slc16a1                                                                           | Solute carrier family 16 (monocarboxylate transporter), member 1 | -5.6       | 5.7E-05 | -2.8         | 9.4E-03 | a                 | a           | 1.1                      |

The fold change (FC) values reported from the array (n=3 per group) and confirmed by qRT-PCR (n=4 per group) and RNA-sequencing (n=3 per group). (a: absent; Adj-p value <0.05).

**Supplementary Table 5. Global microRNA profiling of adult versus newborn rat islets.** 311 microRNAs were analyzed by microarray and 68 were significantly change > 2 fold. 30 were up-regulated (left panel) and 38 were down-regulated (right panel) in 3-month-old rat islets compared to 10-day-old rat islets. Data are expressed in fold change (FC) and mean are given in Log2 scale and are the mean  $\pm$  SD of 4 individual rats ( $p < 0.05$ )

| <b>Up-regulated microRNAs &gt; 2 fold</b> |                                 |                    |                        |                          |
|-------------------------------------------|---------------------------------|--------------------|------------------------|--------------------------|
| <b>microRNA ID</b>                        | <b>Fold change Adult vs P10</b> | <b>adj.P.Value</b> | <b>Mean P10 (Log2)</b> | <b>Mean adult (Log2)</b> |
| rno-miR-29b-3p                            | 8.6                             | 2.53E-04           | 10.60                  | 13.71                    |
| rno-miR-344a-3p                           | 6.0                             | 9.04E-04           | 4.58                   | 7.16                     |
| rno-miR-129-5p                            | 5.7                             | 4.60E-03           | 5.86                   | 8.36                     |
| rno-miR-132-3p                            | 5.4                             | 3.11E-03           | 4.67                   | 7.11                     |
| rno-miR-29c-3p                            | 5.4                             | 1.84E-04           | 10.00                  | 12.44                    |
| rno-miR-129-2-3p                          | 5.0                             | 1.44E-03           | 6.61                   | 8.93                     |
| rno-miR-129-1-3p                          | 4.9                             | 3.1E-04            | 5.89                   | 8.19                     |
| rno-miR-384-5p                            | 4.8                             | 3.8E-03            | 8.21                   | 10.48                    |
| rno-miR-383-5p                            | 4.6                             | 1.9E-04            | 3.49                   | 5.68                     |
| rno-miR-29a-3p                            | 4.5                             | 1.8E-04            | 11.12                  | 13.28                    |
| rno-miR-29c-5p                            | 4.1                             | 2.0E-04            | 5.64                   | 7.68                     |
| rno-miR-204-5p                            | 3.8                             | 3.7E-04            | 7.51                   | 9.44                     |
| rno-miR-325-3p                            | 3.7                             | 1.3E-02            | 6.43                   | 8.32                     |
| rno-miR-22-5p                             | 3.5                             | 5.8E-04            | 4.16                   | 5.96                     |
| rno-miR-153-3p                            | 3.4                             | 7.9E-03            | 7.85                   | 9.62                     |
| rno-miR-483-5p                            | 3.1                             | 4.4E-03            | 6.92                   | 8.55                     |
| rno-miR-7a-2-3p                           | 3.0                             | 1.2E-02            | 5.71                   | 7.30                     |
| rno-miR-598-3p                            | 3.0                             | 1.7E-02            | 6.22                   | 7.79                     |
| rno-miR-384-3p                            | 2.9                             | 7.3E-04            | 3.74                   | 5.30                     |
| rno-miR-455-5p                            | 2.9                             | 3.1E-03            | 6.40                   | 7.96                     |
| rno-miR-195-5p                            | 2.9                             | 8.4E-04            | 8.10                   | 9.65                     |
| rno-miR-451-5p                            | 2.8                             | 8.5E-03            | 7.29                   | 8.77                     |
| rno-miR-22-3p                             | 2.6                             | 1.3E-03            | 10.78                  | 12.16                    |
| rno-miR-3546                              | 2.5                             | 3.9E-02            | 4.34                   | 5.64                     |
| rno-miR-183-5p                            | 2.4                             | 2.8E-03            | 8.59                   | 9.82                     |
| rno-miR-325-5p                            | 2.3                             | 2.4E-03            | 4.10                   | 5.31                     |
| rno-miR-497-5p                            | 2.2                             | 2.5E-03            | 8.22                   | 9.38                     |
| rno-miR-98-5p                             | 2.2                             | 8.9E-04            | 8.90                   | 10.03                    |
| rno-miR-495                               | 2.0                             | 2.4E-03            | 5.72                   | 6.73                     |
| rno-miR-144-3p                            | 2.0                             | 2.7E-02            | 4.64                   | 5.64                     |

**Down-regulated microRNAs > 2 fold**

| <b>microRNA ID</b> | <b>Fold change Adult vs P10</b> | <b>adj.P.Value</b> | <b>Mean P10 (Log2)</b> | <b>Mean adult (Log2)</b> |
|--------------------|---------------------------------|--------------------|------------------------|--------------------------|
| rno-miR-215        | -139.2                          | 5.82E-04           | 9.62                   | 2.50                     |
| rno-miR-194-5p     | -9.5                            | 8.70E-03           | 10.16                  | 6.91                     |
| rno-miR-203a-3p    | -6.9                            | 2.58E-03           | 7.60                   | 4.81                     |
| rno-miR-192-5p     | -6.8                            | 1.37E-02           | 10.85                  | 8.09                     |
| rno-miR-130b-3p    | -5.3                            | 8.92E-04           | 7.96                   | 5.57                     |
| rno-miR-181b-5p    | -5.1                            | 3.86E-03           | 7.68                   | 5.35                     |
| rno-miR-181d-5p    | -4.7                            | 7.4E-04            | 7.18                   | 4.94                     |
| rno-miR-19b-3p     | -4.5                            | 6.0E-04            | 11.30                  | 9.13                     |
| rno-miR-181a-5p    | -4.4                            | 3.1E-03            | 9.54                   | 7.41                     |
| rno-miR-92a-3p     | -4.3                            | 4.5E-03            | 10.43                  | 8.31                     |
| rno-miR-17-5p      | -4.2                            | 2.3E-04            | 8.01                   | 5.94                     |
| rno-miR-20b-5p     | -3.8                            | 2.6E-04            | 8.65                   | 6.72                     |
| rno-miR-181c-5p    | -3.8                            | 3.3E-04            | 7.82                   | 5.91                     |
| rno-miR-503-5p     | -3.8                            | 3.1E-03            | 4.86                   | 2.95                     |
| rno-miR-18a-5p     | -3.7                            | 2.0E-04            | 6.44                   | 4.56                     |
| rno-miR-20a-5p     | -3.6                            | 3.7E-04            | 9.50                   | 7.64                     |
| rno-miR-192-3p     | -3.5                            | 2.2E-02            | 4.03                   | 2.23                     |
| rno-miR-19a-3p     | -3.5                            | 3.3E-04            | 8.56                   | 6.77                     |
| rno-miR-322-3p     | -3.3                            | 9.5E-04            | 5.30                   | 3.57                     |
| rno-miR-542-5p     | -3.2                            | 6.0E-04            | 5.67                   | 3.99                     |
| rno-miR-1949       | -3.0                            | 1.2E-02            | 7.46                   | 5.87                     |
| rno-miR-542-3p     | -3.0                            | 1.3E-03            | 5.72                   | 4.14                     |
| rno-miR-93-5p      | -2.8                            | 2.7E-04            | 8.48                   | 6.97                     |
| rno-miR-199a-5p    | -2.8                            | 2.5E-04            | 8.83                   | 7.33                     |
| rno-miR-450a-5p    | -2.8                            | 1.8E-04            | 6.92                   | 5.45                     |
| rno-miR-199a-3p    | -2.7                            | 2.5E-04            | 10.43                  | 8.98                     |
| rno-miR-214-3p     | -2.7                            | 3.1E-04            | 8.67                   | 7.22                     |
| rno-miR-675-3p     | -2.6                            | 7.9E-03            | 4.63                   | 3.25                     |
| rno-miR-184        | -2.5                            | 2.9E-02            | 4.94                   | 3.64                     |
| rno-miR-378a-3p    | -2.4                            | 1.4E-02            | 7.70                   | 6.42                     |
| rno-miR-218a-5p    | -2.3                            | 2.0E-04            | 7.78                   | 6.58                     |
| rno-miR-25-3p      | -2.3                            | 8.5E-03            | 10.00                  | 8.81                     |
| rno-miR-15b-5p     | -2.3                            | 2.5E-04            | 10.96                  | 9.79                     |
| rno-miR-106b-5p    | -2.2                            | 5.1E-04            | 10.05                  | 8.92                     |
| rno-miR-301b-3p    | -2.1                            | 6.0E-04            | 4.22                   | 3.13                     |
| rno-miR-365-3p     | -2.1                            | 1.6E-02            | 7.91                   | 6.83                     |
| rno-miR-181a-1-3p  | -2.1                            | 8.9E-04            | 5.02                   | 3.95                     |
| rno-miR-20a-3p     | -2.0                            | 5.1E-04            | 4.26                   | 3.26                     |



**Supplementary Table 6. Predicted miRNA targets.** Predicted targeted genes related to glucose metabolism, cell proliferation and insulin secretion are reported for the 8 miRNAs (miR-17-5p, miR-18a, miR-25, miR-106b, miR-181b, miR-194, miR-203, miR-129) that we identified to significantly play a role in postnatal  $\beta$ -cell maturation. miR-17-5p, miR-106b and miR-181b are highlighted in green and purple, respectively. and miRSystem algorithms which integrates miRNA target gene predictions in human and rats from DIANA, miRanda, miRBridge, PicTar, PITA, rna22, were used.

| <b>Predicted target mRNAs</b> |                                                     |              |                                                      |
|-------------------------------|-----------------------------------------------------|--------------|------------------------------------------------------|
| <b>Gene name</b>              | <b>Gene description</b>                             | <b>miRNA</b> | <b>Category</b>                                      |
| Birc5 (Survivin)              | Baculoviral IAP repeat-containing 5                 | miR-203      | Mitogen and anti-apoptotic                           |
| Ccnd2                         | Cyclin D2                                           | miR-17-5p    | Mitogen                                              |
|                               |                                                     | miR-106b     |                                                      |
|                               |                                                     | miR-18a      |                                                      |
| Cdkn1a (p21)                  | Cyclin-dependent kinase inhibitor 1A                | miR-17-5p    | Tumor suppressor                                     |
|                               |                                                     | miR-106b     |                                                      |
| Cdkn1b (p27)                  | Cyclin-dependent kinase inhibitor 1B                | miR-181b     | Tumor suppressor                                     |
| Cdkn1c (p57)                  | Cyclin-dependent kinase inhibitor 1C                | miR-129      | Tumor suppressor                                     |
| Cyld                          | Cylindromatosis (turban tumor syndrome)             | miR-17-5p    |                                                      |
|                               |                                                     | miR-106b     |                                                      |
|                               |                                                     | miR-181b     |                                                      |
| G6pc                          | Glucose-6-phosphatase                               | miR-203      | Gluconeogenesis                                      |
| Got2                          | Glutamic-oxaloacetic transaminase 2, mitochondrial  | miR-194      | TCA cycle                                            |
| Gpd2                          | Glycerol-3-phosphate dehydrogenase 2, mitochondrial | miR-17-5p    | Mitochondrial shuttle                                |
|                               |                                                     | miR-106b     |                                                      |
|                               |                                                     | miR-181b     |                                                      |
| Hnf1b                         | HNF1 homeobox B                                     | miR-25       | Pancreas development                                 |
|                               |                                                     | miR-194      |                                                      |
| ldh1                          | Isocitrate dehydrogenase 1                          | miR-25       | TCA cycle                                            |
| Irs2                          | Insulin receptor substrate 2                        | miR-25       | Mitogen, anti-apoptotic, insulin secretion regulator |
|                               |                                                     | miR-181b     |                                                      |
| Ldha                          | Lactate dehydrogenase A                             | miR-203      | Aerobic glycolysis                                   |
| Mdh1                          | Malate dehydrogenase 1                              | miR-181b     | Mitochondrial shuttle                                |
| p130 (Rbl2)                   | Retinoblastoma-like 2                               | miR-17-5p    | Tumor suppressor                                     |
|                               |                                                     | miR-106b     |                                                      |
| Pfkip                         | Phosphofructokinase, platelet                       | miR-17-5p    | Glycolysis                                           |
|                               |                                                     | miR-106b     |                                                      |
| Pgam1                         | Phosphoglycerate mutase 1                           | miR-25       | Glycolysis                                           |
| Pten                          | Phosphatase and tensin homolog                      | miR-17-5p    | Tumor suppressor                                     |
|                               |                                                     | miR-106b     |                                                      |
|                               |                                                     | miR-181b     |                                                      |
|                               |                                                     | miR-18a      |                                                      |
|                               |                                                     | miR-25       |                                                      |

## Predicted target mRNAs

| Gene name    | Gene description                                                              | miRNA     | Category                                                   |
|--------------|-------------------------------------------------------------------------------|-----------|------------------------------------------------------------|
| Tcf7l2       | Transcription factor 7-like 2                                                 | miR-181b  | Insulin secretion and $\beta$ -cell regeneration regulator |
|              |                                                                               | miR-194   |                                                            |
| Tgfbr1       | Transforming growth factor, beta receptor1                                    | miR-181b  | Tumor suppressor                                           |
| Tgfbr2       | Transforming growth factor, beta receptor2                                    | miR-17-5p | Tumor suppressor                                           |
|              |                                                                               | miR-106b  |                                                            |
|              |                                                                               | miR-181b  |                                                            |
| Timp2        | TIMP metalloproteinase inhibitor 2                                            | miR-17-5p | Tumor suppressor                                           |
|              |                                                                               | miR-106b  |                                                            |
| Timp3        | TIMP metalloproteinase inhibitor 3                                            | miR-181b  | Tumor suppressor                                           |
| Sirt1        | Sirtuin 1                                                                     | miR-181b  | Proliferation, survival and insulin secretion regulator    |
|              |                                                                               | miR-194   |                                                            |
| Slc1a3       | Solute carrier family 1 (glial high affinity glutamate transporter), member 3 | miR-194   | Glutamate aspartate transporter                            |
| Slc2a2       | Solute carrier family 2 (facilitated glucose transporter), member 2           | miR-17-5p | Glucose transporter                                        |
|              |                                                                               | miR-106b  |                                                            |
|              |                                                                               | miR-194   |                                                            |
| Slc2a3       | Solute carrier family 2 (facilitated glucose transporter), member 3           | miR-25    | Glucose transporter                                        |
| Smad2        | SMAD family member 2                                                          | miR-18a   | Tumor suppressor                                           |
|              |                                                                               | miR-181b  |                                                            |
| Smad4        | SMAD family member 4                                                          | miR-17-5p | Tumor suppressor                                           |
|              |                                                                               | miR-106b  |                                                            |
| Sox4         | SRY (sex determining region Y)-box 4                                          | miR-129   | Pancreas development                                       |
| Stk11 (Lkb1) | Serine/threonine kinase 11                                                    | miR-17-5p | Tumor suppressor and insulin secretion regulator           |
|              |                                                                               | miR-106b  |                                                            |

**Supplementary Table 7. Predicted miRNA targets for miR-29b-3p.** Predicted targeted genes related to glucose metabolism, cell proliferation and insulin secretion are reported for miR-29b. miRWalk, miRSystem and TargetScan algorithms were used.

## Predicted target mRNAs for miRNA-29b

| Gene name       | Gene description                                                      | Category                                                                |
|-----------------|-----------------------------------------------------------------------|-------------------------------------------------------------------------|
| G6pc            | Glucose-6-phosphatase, catalytic subunit                              | Gluconeogenesis                                                         |
| Mafb            | v-maf avian musculoaponeurotic fibrosarcoma oncogene homolog B        | Transcription factor involves in $\beta$ -cell development and function |
| Pdgfra          | Platelet-derived growth factor receptor, alpha polypeptide            | Cell proliferation                                                      |
| Pdgfrb          | Platelet-derived growth factor receptor, beta polypeptide             | Cell proliferation                                                      |
| Rest            | RE1-silencing transcription factor                                    | Neuronal transcriptional repressor                                      |
| Slc16a1 (=Mct1) | Solute carrier family 16, member 1 (monocarboxylic acid transporter1) | Pyruvate/lactate/ketone bodies transporter                              |

**Supplementary Table 8. List of gene ontology functions significantly enriched in the increased RISC Incorporation Ratio fraction of transcripts upon miR-17-5p overexpression in 10-day-old rat islet cells.**

|                                                                           | No. of genes | Benjamini p-values |
|---------------------------------------------------------------------------|--------------|--------------------|
| regulation of cell proliferation                                          | 11           | 0.02               |
| regulation of macromolecule metabolic process                             | 10           | 0.04               |
| regulation of molecular function                                          | 9            | 0.03               |
| regulation of cellular protein metabolic process                          | 8            | 0.03               |
| heart development                                                         | 6            | 0.01               |
| leukocyte activation                                                      | 6            | 0.02               |
| cell activation                                                           | 6            | 0.03               |
| regulation of protein modification process                                | 6            | 0.04               |
| mitotic cell cycle                                                        | 6            | 0.01               |
| regulation of binding                                                     | 5            | 0.01               |
| regulation of protein metabolic process                                   | 5            | 0.03               |
| posttranscriptional regulation of gene expression                         | 5            | 0.04               |
| regulation of protein stability                                           | 4            | 0.00               |
| regulation of ubiquitin-protein ligase activity during mitotic cell cycle | 4            | 0.01               |
| regulation of ubiquitin-protein ligase activity                           | 4            | 0.01               |
| regulation of ligase activity                                             | 4            | 0.01               |
| regulation of protein ubiquitination                                      | 4            | 0.02               |
| muscle system process                                                     | 4            | 0.08               |
| monocarboxylic acid transport                                             | 3            | 0.04               |
| regulation of cell cycle                                                  | 3            | 0.05               |

**Supplementary Table 9. Primer sequences.**

| Genes       | Forward primer              | Reverse primer             | Species |
|-------------|-----------------------------|----------------------------|---------|
| 18S         | 5'-GGAATTATCCCATGAACG-3'    | 5'-GGCCTACTAAACCATCCAA-3'  | R, M, H |
| Aldob       | 5'-CCCTGGCTGTACCTGTCAT-3'   | 5'-TGCCTTCGGTTCTTTCAGT-3'  | R       |
| Ccna2       | 5'-GAGAATGTCAACCCCGAAAA-3'  | 5'-GGGACGTGCTCATCGTTTAT-3' | R       |
| Ccnb1       | 5'-AATTGGAGAGGTGCGATGTGG-3' | 5'-CTCCGTGTGGGACAGGTAGT-3' | R       |
| Ccnd2       | 5'-TTACCTGGACCGTTTCTTGG-3'  | 5'-TGCTCAATGAAGTCGTGAGG-3' | R, M, H |
| Cdkn1a      | 5'-TCAGTGGACCAGAAGGGAAC-3'  | 5'-GGTCCCATCCCAGATAAGT-3'  | R       |
| Cdkn1b      | 5'-CAGAATCATAAGCCCCTGGA-3'  | 5'-TCTGACGAGTCAGGCATTTG-3' | R, M    |
| C-myc       | 5'-CGAGCTGAAGCGTAGCTTTT-3'  | 5'-CTCGCCGTTTCTCAGTAAG-3'  | R       |
| Cyld        | 5'-AGGAAAGGAGACCTCCAAA-3'   | 5'-GCAGGGTCTTCTGCAACTTC-3' | R       |
| Eno2        | 5'-GTGGACCACATCAACAGCAC-3'  | 5'-TGAGCAATGTGGCGATAGAG-3' | R, M    |
| G6pc        | 5'-ACCCTGGTAGCCCTGTCTTT-3'  | 5'-GGGCTTTCTTCTGTGTGC-3'   | R       |
| G6pi        | 5'-CACTGCATGTGGGTTTTGAC-3'  | 5'-GCTGAAATAGGCAGCAAAG-3'  | R       |
| Gapdh       | 5'-AGACAGCCGCATCTTCTGT-3'   | 5'-CTTGCCGTGGGTAGAGTCAT-3' | R       |
| Gck         | 5'-TTTGCAACTCAGCCAGAC-3'    | 5'-ATTGTTGGTGCCAGAGTC-3'   | R       |
| Glud1       | 5'-GGCGTCCCTAATGACCTACA-3'  | 5'-CCTATGGTGTGGCATAGGT-3'  | R       |
| Gpd2        | 5'-CCGACTGACTCCGTTCTAGC-3'  | 5'-TACGCCAGGCTTACTTGCTT-3' | R       |
| Irs2        | 5'-CCACACACTGTCCTCATTG-3'   | 5'-TAATCCGCTTTGCCAAAATC-3' | R       |
| Ldha        | 5'-AGACTTGGCCGAGAGCATAA-3'  | 5'-CTGCAGCTCCTTCTGGATTC-3' | R, M    |
| Mafb        | 5'-TATTCCAAGGAGTCGCCAAG-3'  | 5'-CTGAGAGCCAGTGTTACCA-3'  | R       |
| Mdh1        | 5'-GAAGCCCTCAAAGACGACAG-3'  | 5'-CGACAGGGAACGAGTAGAGC-3' | R       |
| Mdh2        | 5'-TTGTCTTCTCCCTGGTGGAC-3'  | 5'-CAAAGTCTCGCTTTCTTG-3'   | R, M    |
| P85a        | 5'-ACCAGTGTGACCCTTCCTG-3'   | 5'-GGCGAGATAGCGTTTAAAAG-3' | R       |
| P130 (Rbl2) | 5'-TAAGTCACTCTGGCCTGCT-3'   | 5'-CTTGGTTTTCCATGCCAAGT-3' | R       |
| Pc          | 5'-AGATGCACTTCCATCCCAAG-3'  | 5'-CCTTGGTACGTGAACCTTT-3'  | R       |
| Pck1        | 5'-CCCAGGAGTACCATCACTT-3'   | 5'-TTCGTAGACAAGGGGACCA-3'  | R       |
| Pck2        | 5'-GCACGGGTAGAAAGCAAGAC-3'  | 5'-CATGCATCCTGGGAATCTCT-3' | R, M    |
| Pdha1       | 5'-AGGAACACTGGGTGATCTGG-3'  | 5'-ACGGTAAGAGAGCCTGCAAA-3' | R       |
| Pdgfra      | 5'-CTTGCAATCCGTCAGTAGCA-3'  | 5'-ACGTCTCGGCTAGGGTTAT-3'  | R       |
| Pdgfrb      | 5'-TGTTCTGTGCTATTGCTCCTG-3' | 5'-TGTCAGCACACTGGAGAAGG-3' | R       |

Rat (R); Mouse (M); Human (H)

| Genes          | Forward primer             | Reverse primer             | Species |
|----------------|----------------------------|----------------------------|---------|
| Pfkm           | 5'-AGGTGACCAAAGACGTGACC-3' | 5'-TGGATAAGGCCAATCCTCAC-3' | R, M    |
| Pfkp           | 5'-TTGACTGCAGGAAGAACGTG-3' | 5'-TCCTTAGCTCTGCCACTGGT-3' | R       |
| Pgam1          | 5'-CTCAGGGCAAGGTGAAGAAG-3' | 5'-GGTGCCGGGGATAAAATACT-3' | R, M    |
| Pkm2           | 5'-CCTATCCATTAGGCCAGCAA-3' | 5'-TTTCCAATCCTGCATTCTC-3'  | R       |
| Pten           | 5'-ACACCGCCAAATTTAACTGC-3' | 5'-TACACCAGTCCGTCCTTTCC-3' | R       |
| Rest           | 5'-ACAACGGGCCTAAACCTCT-3'  | 5'-TCAGCTTCACTTTGGACAG-3'  | R       |
| Sirt1          | 5'-CCAGATCCTCAAGCCATGTT-3' | 5'-GATCCTTTGGATTCTGCAA-3'  | R       |
| Slc2a2 (Glut2) | 5'-CAATTCATCATCGCCCTCT-3'  | 5'-TGCAGCAATTCGTCAAAAG-3'  | R       |
| Slc16a1 (Mct1) | 5'-TATGCCGGAGGTCCTATCAG-3' | 5'-AGTTGAAAGCAAGCCCAAGA-3' | R, M    |
| Stk11 (Lkb1)   | 5'-CCTGCAGAGAAAACCCAGAG-3' | 5'-GCAGCTTCAAGTTTCCAAG-3'  | R, M    |
| Smad2          | 5'-CCAGGTCTCTTGATGGTCGT-3' | 5'-TCTCCACCCTCTGGTAGTGG-3' | R       |
| Smad3          | 5'-CTTGGTGCAGAGACCTGTCA-3' | 5'-CAGGTGGGATCCTATGTGCT-3' | R       |
| Smad4          | 5'-TCGATTCAAACCATCCAACA-3' | 5'-GCCCTGAAGCTATCTGCAAC-3' | R, M    |
| Tcf7l2         | 5'-GTCGGCTCACTCCATAGCTC-3' | 5'-TTCCGGGCTAGCTCGTAGTA-3' | R, M, H |
| Tgfb2          | 5'-AATCCTAGCCAGGGACGTTT-3' | 5'-TGCAGGAGCAAAAAGGTTCT-3' | R       |
| Tgfr1          | 5'-TTTGAGGAGGGCAGCTTTTA-3' | 5'-ACCAGTGAGGAGACCCAATG-3' | R       |
| Tgfr2          | 5'-TCACTAGGCACGTCATCAGC-3' | 5'-AGGACAACCCGAAGTCACAC-3' | R       |
| Timp2          | 5'-CAAGTTCTTTGCCTGCATCA-3' | 5'-TCCAGGAAGGGATGTCAAAG-3' | R       |
| Timp3          | 5'-TGTACACCCAGCCTCTTTC-3'  | 5'-CTTCTCGCCAAGACCTCAAC-3' | R       |
| Ucn3           | 5'-CTTCAGTCGCTCAACACAG-3'  | 5'-GCTGTGCTTGGGATTGGTAT-3' | R       |

Rat (R); Mouse (M); Human (H)

**Mature miRNA sequences.**

| Name            | Mature miRNA sequences          |
|-----------------|---------------------------------|
| rno-miR-106b-5p | 5'-UAAAGUGCUGACAGUGCAGAU-3'     |
| rno-miR-129-5p  | 5'-CUUUUUJUGCGGUCUGGGCUUGC-3'   |
| rno-miR-130b-3p | 5'-CAGUGCAAUGAUGAAAGGGCAU-3'    |
| rno-miR-17-5p   | 5'-CAAAGUGCUUACAGUGCAGGUAG-3'   |
| rno-miR-18a-5p  | 5'-UAAGGUGCAUCUAGUGCAGAUAG-3'   |
| rno-miR-181b-5p | 5'-AACAUUCAUUGCUGUCGGUGGGU-3'   |
| rno-miR-19b-3p  | 5'-UGUGCAAUCCAUGCAAACUGA-3'     |
| rno-miR-192-5p  | 5'-CUGACCUAUGAAUUGACAGCC-3'     |
| rno-miR-194-5p  | 5'-UGUAACAGCAACUCCAUGUGGA-3'    |
| rno-miR-20a-5p  | 5'-UAAAGUGC UU AUAGUGCAGGUAG-3' |
| rno-miR-203     | 5'-GUGAAAUGUUUAGGACCACUAG-3'    |
| rno-miR-204-5p  | 5'-UUCUUUUGUCAUCCUAUGCCU-3'     |
| rno-miR-215     | 5'-AUGACCUAUGAAUUGACAGAC-3'     |
| rno-miR-25-3p   | 5'-CAUUGCACUUGUCUCGGUCUGA-3'    |
| rno-miR-29b     | 5'-UAGCACCAUUUGAAAUCAGUGUU-3'   |
| rno-miR-92a-3p  | 5'-UAUUGCACUUGUCCCGCCUG-3'      |
| rno-miR-93-5p   | 5'-CAAAGUGCUGUUCGUGCAGGUAG-3'   |

**References:**

1. Ku GM, Kim H, Vaughn IW, Hangauer MJ, Myung Oh C, German MS, and McManus MT. Research resource: RNA-Seq reveals unique features of the pancreatic beta-cell transcriptome. *Molecular endocrinology* 26, 1783-92 (2012).
